# Supplementary material for: Computational Modelling of Pyrrolic MN4 Motifs Embedded in Graphene for Catalyst Design
Source: MDPI journal article supplement (doi:10.3390/catal13030566), 2023-03-10
Supplement: s1 [file s1]

# Supplementary Materials: Computational Modelling of Pyrrolic MN<sub>4</sub> Motifs Embedded in Graphene for Catalyst Design

Jian Liang Low \*  and Beate Paulus \* 

## Contents

|                                                    |           |
|----------------------------------------------------|-----------|
| <b>1. Structural Data</b>                          | <b>1</b>  |
| 1.1. FeN <sub>4</sub> , Pyrrolic-1                 | 1         |
| 1.2. FeN <sub>4</sub> , Pyrrolic-1L                | 3         |
| 1.3. FeN <sub>4</sub> , Pyrrolic-2                 | 6         |
| 1.4. FeN <sub>4</sub> , Pyrrolic-2L                | 7         |
| 1.5. FeN <sub>4</sub> , Pyridinic-1                | 10        |
| 1.6. FeN <sub>4</sub> , Pyridinic-1L               | 12        |
| 1.7. FeN <sub>4</sub> , Pyridinic-2                | 15        |
| 1.8. FeN <sub>4</sub> , Pyridinic-2L               | 17        |
| 1.9. FeN <sub>4</sub> , Pyrrolic-UC1               | 20        |
| 1.10. FeN <sub>4</sub> , Pyrrolic-UC1b             | 22        |
| 1.11. FeN <sub>4</sub> , Pyridinic-UC              | 25        |
| <b>2. Non-planar MN<sub>4</sub> binding</b>        | <b>26</b> |
| <b>3. Frontier Molecular Orbitals of Fe and Zn</b> | <b>27</b> |

### 1. Structural Data

The structural data for FeN<sub>4</sub> clusters and unit cells. For each cluster, the top and side views are shown. Cluster geometries are given in xyz format and unit cell geometries are given in VASP POSCAR format.

#### 1.1. FeN<sub>4</sub>, Pyrrolic-1

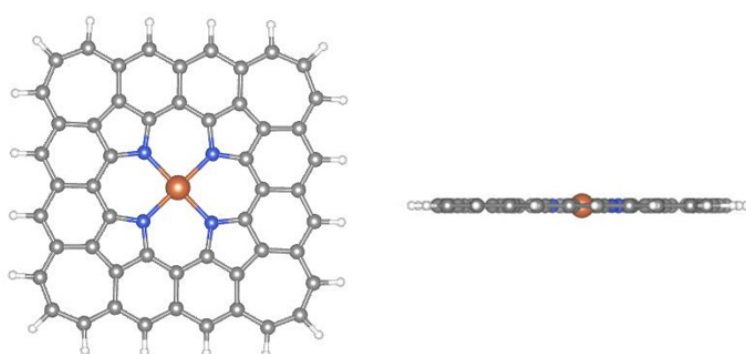

77

|    |            |            |            |
|----|------------|------------|------------|
| Fe | 0.0000003  | 0.0000000  | -0.0028854 |
| N  | 1.5297301  | 1.2304290  | -0.0027044 |
| N  | 1.2306124  | -1.5289339 | -0.0024921 |
| N  | -1.5297294 | -1.2304290 | -0.0029250 |
| N  | -1.2306118 | 1.5289339  | -0.0027329 |
| C  | 1.5028481  | 2.5894089  | -0.0024796 |
| C  | 2.8087827  | 3.1520664  | -0.0020020 |

|   |            |            |            |
|---|------------|------------|------------|
| C | 3.6841437  | 2.0637356  | -0.0018571 |
| C | 2.8587782  | 0.9113956  | -0.0022247 |
| C | -0.9130634 | 2.8533393  | -0.0023483 |
| C | -2.5989855 | 1.5026596  | -0.0022713 |
| C | -2.0597321 | 3.6797925  | -0.0017644 |
| C | -3.1577317 | 2.7962824  | -0.0017267 |
| C | -2.8587777 | -0.9113956 | -0.0027054 |
| C | -1.5028475 | -2.5894089 | -0.0026320 |
| C | -2.8087822 | -3.1520665 | -0.0025435 |
| C | -3.6841432 | -2.0637356 | -0.0025231 |
| C | 2.5989861  | -1.5026596 | -0.0019140 |
| C | 0.9130639  | -2.8533393 | -0.0021286 |
| C | 3.1577322  | -2.7962824 | -0.0013457 |
| C | 2.0597326  | -3.6797925 | -0.0014799 |
| C | 3.4146497  | -0.3639964 | -0.0017202 |
| C | 0.3752701  | 3.4114333  | -0.0021929 |
| C | -3.4146491 | 0.3639964  | -0.0021592 |
| C | -0.3752696 | -3.4114332 | -0.0020532 |
| C | -1.9389067 | 5.1015690  | -0.0010318 |
| C | 0.5293651  | 4.8409117  | -0.0015776 |
| C | -0.6452399 | 5.6462346  | -0.0011366 |
| C | 5.1167800  | 1.9437166  | -0.0011989 |
| C | 4.8554901  | -0.5212571 | -0.0009962 |
| C | 4.5750120  | -2.9876381 | -0.0005519 |
| C | 5.3869581  | -1.8380684 | -0.0004473 |
| C | 5.6616022  | 0.6448728  | -0.0008699 |
| C | 1.9389071  | -5.1015690 | -0.0008578 |
| C | -0.5293647 | -4.8409117 | -0.0015350 |
| C | -5.1167796 | -1.9437167 | -0.0020096 |
| C | -4.8554897 | 0.5212571  | -0.0017239 |
| C | -5.6616016 | -0.6448729 | -0.0018496 |
| C | -5.3869576 | 1.8380685  | -0.0014058 |
| C | -4.5750116 | 2.9876381  | -0.0011366 |
| C | -2.9937186 | -4.5747255 | -0.0019580 |
| C | -1.8451505 | -5.3820948 | -0.0016999 |
| C | 1.8451509  | 5.3820948  | -0.0014046 |
| C | 2.9937190  | 4.5747254  | -0.0014875 |
| C | 0.6452403  | -5.6462346 | -0.0010837 |
| C | -5.9198439 | -3.1046244 | -0.0014991 |
| C | -5.1197980 | 4.3011093  | -0.0005130 |
| C | -3.1125236 | 5.9189781  | -0.0002913 |
| C | 4.3082340  | 5.1122488  | -0.0008032 |
| C | 5.9198442  | 3.1046244  | -0.0006040 |
| C | 5.1197982  | -4.3011094 | -0.0000141 |
| C | -4.3082337 | -5.1122488 | -0.0015084 |
| C | 3.1125239  | -5.9189783 | -0.0002587 |
| C | -5.5443968 | -4.4601192 | -0.0013003 |
| H | -6.3978052 | -5.1451806 | -0.0006347 |
| C | -4.4578171 | 5.5412944  | -0.0001619 |
| C | 5.5443970  | 4.4601191  | -0.0003860 |
| C | 4.4578174  | -5.5412946 | -0.0000157 |
| H | 5.1449684  | -6.3938727 | 0.0005769  |
| H | -0.5316535 | 6.7334462  | -0.0006772 |
| H | 1.9643315  | 6.4686095  | -0.0009598 |

|   |            |            |            |
|---|------------|------------|------------|
| H | 6.7485221  | 0.5302318  | -0.0003273 |
| H | 6.4729498  | -1.9618381 | 0.0000946  |
| H | 6.2128448  | -4.3577021 | 0.0004692  |
| H | 0.5316538  | -6.7334462 | -0.0007387 |
| H | -1.9643312 | -6.4686095 | -0.0013933 |
| H | -4.3645752 | -6.2060187 | -0.0011543 |
| H | -7.0005150 | -2.9271960 | -0.0010095 |
| H | -6.7485216 | -0.5302319 | -0.0015574 |
| H | -6.4729494 | 1.9618382  | -0.0012190 |
| H | -2.9315603 | 6.9985091  | 0.0002539  |
| H | -5.1449681 | 6.3938724  | 0.0004834  |
| H | -6.2128446 | 4.3577019  | -0.0002592 |
| H | 6.3978054  | 5.1451806  | 0.0002053  |
| H | 4.3645754  | 6.2060186  | -0.0003126 |
| H | 7.0005153  | 2.9271959  | 0.0000101  |
| H | 2.9315606  | -6.9985094 | 0.0000765  |

## 1.2. $\text{FeN}_4$ , Pyrrolic-1L

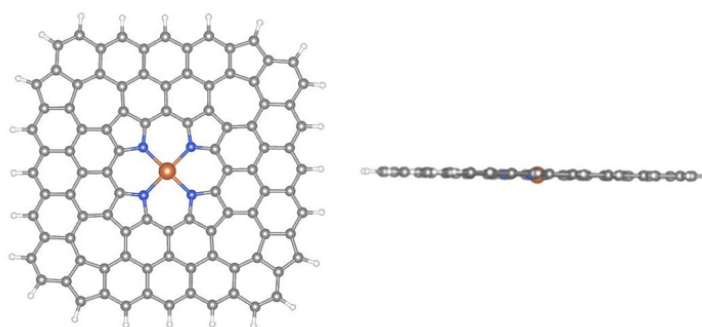

125

|    |            |            |            |
|----|------------|------------|------------|
| Fe | -1.7165572 | -0.3805287 | -0.0283683 |
| N  | -1.4174612 | 1.5511571  | -0.0691798 |
| N  | 0.2140301  | -0.6796669 | -0.0945663 |
| N  | -2.0154769 | -2.3121343 | 0.0172935  |
| N  | -3.6469281 | -0.0813031 | 0.0434283  |
| C  | -2.3705986 | 2.5472151  | -0.0440976 |
| C  | -1.7924284 | 3.8440587  | -0.0794078 |
| C  | -0.3835108 | 3.6608301  | -0.1299881 |
| C  | -0.2113828 | 2.2460284  | -0.1217056 |
| C  | -4.3351338 | 1.1174992  | 0.0551723  |
| C  | -4.6502033 | -1.0401381 | 0.1013786  |
| C  | -5.7560321 | 0.9472872  | 0.1197160  |
| C  | -5.9385542 | -0.4628085 | 0.1485736  |
| C  | -3.2212136 | -3.0068537 | 0.0788984  |
| C  | -1.0619558 | -3.3080237 | 0.0025307  |
| C  | -1.6395404 | -4.6046120 | 0.0534156  |
| C  | -3.0484718 | -4.4213878 | 0.1035777  |
| C  | 1.2176397  | 0.2793161  | -0.1436837 |
| C  | 0.9026705  | -1.8782786 | -0.0945786 |
| C  | 2.5066323  | -0.2977368 | -0.1737370 |
| C  | 2.3242121  | -1.7077848 | -0.1419908 |

---

|   |             |            |            |
|---|-------------|------------|------------|
| C | 1.0596083   | 1.6720125  | -0.1581231 |
| C | -3.7653250  | 2.3931729  | 0.0148755  |
| C | -4.4920150  | -2.4327601 | 0.1202125  |
| C | 0.3330359   | -3.1538712 | -0.0494748 |
| C | -6.6475276  | 2.0662079  | 0.1453146  |
| C | -4.6203919  | 3.5437940  | 0.0395066  |
| C | -6.0474942  | 3.3697918  | 0.1034322  |
| C | 0.7363172   | 4.5600087  | -0.1762566 |
| C | 2.2168776   | 2.5340196  | -0.2045490 |
| C | 3.6709762   | 0.5185666  | -0.2196382 |
| C | 3.5177370   | 1.9512995  | -0.2358209 |
| C | 2.0397254   | 3.9613548  | -0.2137998 |
| C | 3.2165466   | -2.8263314 | -0.1448272 |
| C | 1.1889581   | -4.3041220 | -0.0512629 |
| C | -4.1675106  | -5.3202203 | 0.1708514  |
| C | -5.6484805  | -3.2944153 | 0.1880784  |
| C | -5.4708024  | -4.7215189 | 0.2115062  |
| C | -6.9487934  | -2.7114588 | 0.2341365  |
| C | -7.1021361  | -1.2787729 | 0.2150857  |
| C | -0.8222587  | -5.7635983 | 0.0521606  |
| C | 0.6049313   | -5.6091512 | -0.0012632 |
| C | -4.0358502  | 4.8490432  | 0.0031836  |
| C | -2.6088882  | 5.0033962  | -0.0562425 |
| C | 2.6166531   | -4.1298545 | -0.0992250 |
| C | -8.1259754  | -3.5515175 | 0.3032400  |
| C | -6.6555699  | -5.5485305 | 0.2806891  |
| C | -7.9349258  | -4.9552505 | 0.3231212  |
| C | -6.4860084  | -6.9600452 | 0.3062051  |
| C | -4.0150749  | -6.7643883 | 0.2002261  |
| C | -5.2331054  | -7.5745165 | 0.2697939  |
| C | -8.3796890  | -0.7084602 | 0.2642845  |
| C | -9.5557455  | -1.5527559 | 0.3325186  |
| C | -9.4179909  | -2.9491149 | 0.3504604  |
| C | -10.7026829 | -0.6882158 | 0.3714767  |
| C | -5.1490945  | -9.0196321 | 0.3030154  |
| C | -8.0962882  | 1.9168173  | 0.2125251  |
| C | -8.9029974  | 3.1405920  | 0.2324882  |
| C | -8.2841605  | 4.3918286  | 0.1896896  |
| C | -6.2772012  | 5.8370756  | 0.0890681  |
| C | -4.8759283  | 6.0230865  | 0.0290358  |
| C | -2.0340577  | 6.2880202  | -0.0872265 |
| C | -4.2733989  | 7.3217994  | -0.0045294 |
| C | -2.8831251  | 7.4653478  | -0.0608877 |
| C | -6.8729764  | 4.5555751  | 0.1266793  |
| C | -10.3456808 | 3.0618314  | 0.2983944  |
| C | -2.0230695  | 8.6210477  | -0.1005472 |
| C | 4.6958329   | 2.7917601  | -0.2801228 |
| C | 3.2253799   | 4.7887493  | -0.2592334 |
| C | 0.5847688   | 6.0045629  | -0.1819120 |
| C | 1.8036071   | 6.8150396  | -0.2300894 |
| C | 3.0564822   | 6.2005514  | -0.2671127 |
| C | 4.5050960   | 4.1956263  | -0.2916798 |
| C | 4.9494069   | -0.0513519 | -0.2447040 |
| C | 6.1263079   | 0.7933203  | -0.2898608 |

---

|   |             |             |            |
|---|-------------|-------------|------------|
| C | 5.9885658   | 2.1896800   | -0.3075561 |
| C | 7.2740907   | -0.0708323  | -0.3053731 |
| C | 1.7205728   | 8.2605775   | -0.2373235 |
| C | -1.3962466  | -7.0478596  | 0.1056449  |
| C | 1.4459878   | -6.7827809  | -0.0009632 |
| C | 3.4430430   | -5.3152360  | -0.0979021 |
| C | 4.6661722   | -2.6765496  | -0.1883166 |
| C | 5.4736928   | -3.8999517  | -0.1859796 |
| C | 4.8548764   | -5.1511871  | -0.1429212 |
| C | 2.8476388   | -6.5965931  | -0.0507154 |
| C | -0.5462307  | -8.2248009  | 0.1045253  |
| C | 0.8441679   | -8.0812051  | 0.0513840  |
| C | 6.9172752   | -3.8207786  | -0.2269084 |
| C | -2.7746079  | -7.4699125  | 0.1690006  |
| C | -2.7336814  | -8.9391855  | 0.2055248  |
| C | -8.8014400  | 0.6844220   | 0.2620954  |
| C | -10.2613971 | 0.6461907   | 0.3300414  |
| C | -0.6553716  | 6.7102201   | -0.1419417 |
| C | 5.3715698   | -1.4440457  | -0.2311648 |
| C | 6.8325662   | -1.4053416  | -0.2704301 |
| C | -0.6951775  | 8.1799651   | -0.1486208 |
| C | -11.0121145 | 1.8629982   | 0.3462890  |
| H | -12.1108743 | 1.8285793   | 0.3970519  |
| C | -3.9513680  | -9.6869635  | 0.2726526  |
| H | -3.9168591  | -10.7866108 | 0.2996762  |
| C | -1.4054550  | -9.3801414  | 0.1663415  |
| C | 0.5231851   | 8.9280403   | -0.1978228 |
| H | 0.4894909   | 10.0280322  | -0.2030521 |
| C | 7.5839717   | -2.6218282  | -0.2675674 |
| H | 8.6834921   | -2.5870534  | -0.2972417 |
| H | -6.0961313  | -9.5783141  | 0.3553676  |
| H | -7.3842809  | -7.5957110  | 0.3587028  |
| H | -10.3069245 | -3.5969874  | 0.4030288  |
| H | -10.9039373 | 4.0104526   | 0.3101801  |
| H | -4.9254526  | 8.2093622   | 0.0163034  |
| H | 1.4969904   | -8.9684460  | 0.0509295  |
| H | 3.5033012   | -7.4821034  | -0.0509850 |
| H | 7.4760690   | -4.7691490  | -0.2235674 |
| H | 5.3893391   | 4.8521309   | -0.3255088 |
| H | 6.8781950   | 2.8378635   | -0.3410955 |
| H | 2.6681688   | 8.8194976   | -0.2748679 |
| H | -6.9321289  | 6.7229094   | 0.1088457  |
| H | 8.3223463   | 0.2537293   | -0.3378297 |
| H | 3.9554117   | 6.8364950   | -0.3020399 |
| H | -2.3518729  | 9.6681077   | -0.0934024 |
| H | -8.9167047  | 5.2936859   | 0.2070283  |
| H | -11.7501694 | -1.0124259  | 0.4252714  |
| H | -8.8184758  | -5.6114563  | 0.3756750  |
| H | -1.0758233  | -10.4268590 | 0.1813008  |
| H | 5.4880907   | -6.0527406  | -0.1419916 |

### 1.3. $FeN_4$ , Pyrrolic-2

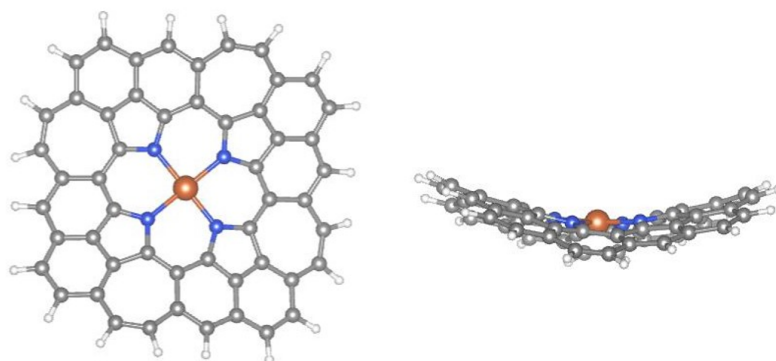

77

|   |            |            |            |
|---|------------|------------|------------|
| N | -1.4424932 | 1.1490840  | -0.1578787 |
| N | 0.2436158  | -1.0637058 | -0.0705514 |
| N | -1.9796272 | -2.7511296 | -0.1087411 |
| N | -3.6563010 | -0.5371636 | 0.0409493  |
| C | -2.3525524 | 2.1595097  | -0.4729382 |
| C | -1.6798615 | 3.4441306  | -0.4758520 |
| C | -0.3638038 | 3.1703944  | -0.0756899 |
| C | -0.2184267 | 1.7732114  | 0.0778423  |
| C | -4.2843407 | 0.6795957  | -0.2204357 |
| C | -4.6635072 | -1.4332709 | 0.4142444  |
| C | -5.6778657 | 0.5435777  | -0.0218799 |
| C | -5.9454363 | -0.7567481 | 0.4277692  |
| C | -3.1833780 | -3.3689920 | 0.2278702  |
| C | -1.0856962 | -3.7727011 | -0.4403418 |
| C | -1.7532302 | -5.0566719 | -0.3571715 |
| C | -3.0435860 | -4.7704191 | 0.1123002  |
| C | 1.2730561  | -0.1585901 | 0.2069704  |
| C | 0.8533231  | -2.2812627 | -0.3658351 |
| C | 2.5548528  | -0.8315999 | 0.1330841  |
| C | 2.2586726  | -2.1378769 | -0.2781311 |
| C | 1.0705737  | 1.2413332  | 0.3379786  |
| C | -3.7583737 | 1.9525820  | -0.5542491 |
| C | -4.4525890 | -2.8303104 | 0.5614925  |
| C | 0.3086084  | -3.5646667 | -0.6270296 |
| C | -6.6408339 | 1.5526903  | -0.2182732 |
| C | -4.7442818 | 3.0147040  | -0.8497245 |
| C | -2.0238341 | 4.7840757  | -0.7877877 |
| C | -4.4494814 | 4.3722609  | -1.3017746 |
| C | -3.3265577 | 5.1517923  | -1.2691181 |
| H | -3.4388457 | 6.1925299  | -1.6150724 |
| H | -5.3513761 | 4.8881490  | -1.6699060 |
| C | 1.2749496  | -4.6325563 | -0.9673657 |
| C | 3.2074947  | -3.1490881 | -0.5234070 |
| C | -1.4269307 | -6.4057826 | -0.6484216 |
| C | -1.0023625 | 5.7702731  | -0.6236656 |
| C | 0.6522178  | 4.1309863  | 0.1031416  |
| C | 0.2886949  | 5.4780670  | -0.1749348 |
| C | 1.9013118  | 3.6058795  | 0.5152833  |

|    |            |            |            |
|----|------------|------------|------------|
| C  | 3.9096645  | -0.4927638 | 0.3883538  |
| C  | 4.5672688  | -2.7911287 | -0.3038616 |
| C  | 4.8856455  | -1.5104106 | 0.1562193  |
| H  | 1.0284345  | 6.2844975  | -0.0580924 |
| H  | -1.2614876 | 6.8132664  | -0.8641792 |
| H  | 5.9394980  | -1.2577615 | 0.3513871  |
| H  | 5.3653085  | -3.5297004 | -0.4745458 |
| C  | -7.2788827 | -1.0874112 | 0.7847147  |
| C  | -7.9817064 | 1.2021314  | 0.1057236  |
| C  | -8.2672587 | -0.0699799 | 0.6086530  |
| C  | -5.5045769 | -3.8027173 | 0.9348386  |
| C  | -4.0427911 | -5.7258183 | 0.3879179  |
| C  | -5.2640568 | -5.1888419 | 0.8630687  |
| H  | -9.3046367 | -0.3170280 | 0.8831208  |
| H  | -8.7893941 | 1.9391158  | -0.0205388 |
| H  | -6.0770621 | -5.8721641 | 1.1503533  |
| C  | -3.6935010 | -7.0812019 | 0.1331069  |
| C  | -2.4329098 | -7.3867780 | -0.3876001 |
| H  | -4.4216070 | -7.8839260 | 0.3245344  |
| H  | -2.1867796 | -8.4367850 | -0.6106823 |
| C  | -0.1595988 | -6.7864328 | -1.2077227 |
| C  | 0.9532537  | -6.0050816 | -1.3509527 |
| H  | -0.0673615 | -7.8380260 | -1.5256545 |
| C  | 2.6615876  | -4.3907152 | -0.9333358 |
| C  | 4.3016797  | 0.7974764  | 0.8794513  |
| C  | 3.5240126  | 1.9187669  | 0.9812161  |
| C  | 2.1455759  | 2.2218178  | 0.6111322  |
| C  | -6.1251885 | 2.7809630  | -0.6998777 |
| H  | -6.8190196 | 3.6028881  | -0.9313173 |
| C  | -7.6380007 | -2.3696537 | 1.3198312  |
| C  | -6.8559571 | -3.4904412 | 1.3874207  |
| H  | 5.3595078  | 0.9034923  | 1.1710375  |
| H  | 4.0592594  | 2.8123808  | 1.3417876  |
| H  | 2.7318966  | 4.2954252  | 0.7277488  |
| H  | 3.3393923  | -5.2170565 | -1.1945255 |
| H  | 1.8276377  | -6.5308134 | -1.7682927 |
| H  | -7.3668219 | -4.3765997 | 1.7982056  |
| H  | -8.6739349 | -2.4693869 | 1.6833473  |
| Fe | -1.7094886 | -0.8018589 | -0.0869915 |

#### 1.4. FeN<sub>4</sub>, Pyrrolic-2L

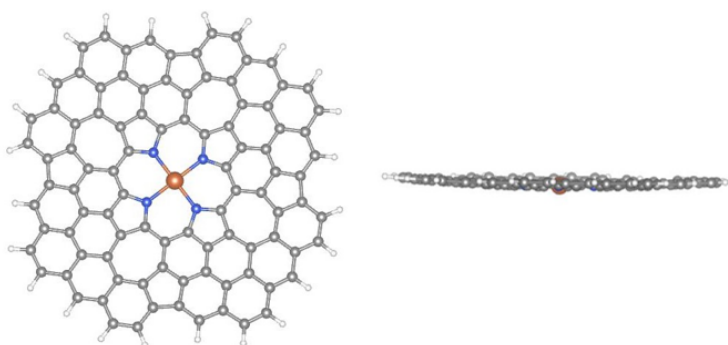

125

|   |            |            |            |
|---|------------|------------|------------|
| N | -1.4098626 | 1.0821494  | -0.3249804 |
| N | 0.2940003  | -1.1666174 | -0.3667392 |
| N | -1.9586762 | -2.8718393 | -0.2850429 |
| N | -3.6624534 | -0.6229377 | -0.2456207 |
| C | -2.3246051 | 2.1370489  | -0.2841870 |
| C | -1.6770651 | 3.4252092  | -0.2875510 |
| C | -0.3229570 | 3.0773366  | -0.3445809 |
| C | -0.1551501 | 1.6834034  | -0.3623696 |
| C | -4.2624374 | 0.6320784  | -0.2227780 |
| C | -4.7165299 | -1.5379022 | -0.1709980 |
| C | -5.6560846 | 0.4648007  | -0.1424853 |
| C | -6.0040464 | -0.8881736 | -0.0981251 |
| C | -3.2126793 | -3.4731124 | -0.2277642 |
| C | -1.0419888 | -3.9258344 | -0.2736428 |
| C | -1.6873286 | -5.2134600 | -0.2066036 |
| C | -3.0428290 | -4.8665208 | -0.1900225 |
| C | 1.3500420  | -0.2511737 | -0.3864601 |
| C | 0.8946468  | -2.4213790 | -0.3757407 |
| C | 2.6397837  | -0.9002485 | -0.4013980 |
| C | 2.2903702  | -2.2536370 | -0.4036437 |
| C | 1.1593585  | 1.1448667  | -0.3832395 |
| C | -3.7230178 | 1.9475349  | -0.2319279 |
| C | -4.5256981 | -2.9340060 | -0.1636858 |
| C | 0.3566309  | -3.7363762 | -0.3218708 |
| C | -6.5531570 | 1.5165702  | -0.0691909 |
| C | -4.6351537 | 3.0505228  | -0.1620002 |
| C | -2.0100140 | 4.8341807  | -0.2205045 |
| C | -4.5168655 | 4.5115495  | -0.1128678 |
| C | -3.3585025 | 5.3450454  | -0.1374322 |
| C | 1.2722561  | -4.8384118 | -0.2959985 |
| C | 3.1910781  | -3.3044871 | -0.3748323 |
| C | -1.3492174 | -6.6206020 | -0.1281028 |
| C | -0.9004562 | 5.7761738  | -0.2180046 |
| C | 0.7291926  | 3.9788538  | -0.3399084 |
| C | 0.4742340  | 5.3561403  | -0.2745333 |
| C | 2.0093351  | 3.4522759  | -0.3631633 |
| C | 4.0476465  | -0.5642243 | -0.3799320 |
| C | 4.5689404  | -3.0484214 | -0.3455240 |
| C | 4.9913714  | -1.6747841 | -0.3539025 |
| C | -7.4067620 | -1.2226627 | 0.0281017  |
| C | -7.9257153 | 1.2621119  | 0.0572935  |
| C | -8.3468978 | -0.1111784 | 0.1019820  |
| C | -5.6293365 | -3.8483121 | -0.0651565 |
| C | -4.0914081 | -5.7668681 | -0.0904836 |
| C | -5.3705031 | -5.2399240 | -0.0355995 |
| C | -3.8309837 | -7.1420007 | -0.0032656 |
| C | -2.4551899 | -7.5614618 | -0.0279714 |
| C | 0.0022796  | -7.1303652 | -0.1251684 |
| C | 1.1588165  | -6.2977235 | -0.2034373 |
| C | 2.6627764  | -4.5833343 | -0.3262964 |
| C | 4.5583337  | 0.7855510  | -0.3638333 |
| C | 3.7226223  | 1.9432001  | -0.3681794 |



|   |             |            |            |
|---|-------------|------------|------------|
| C | 2.2664504   | 2.0602505  | -0.3832546 |
| C | -6.0239306  | 2.7957738  | -0.0854461 |
| C | -7.9143062  | -2.5715830 | 0.1028960  |
| C | -7.0804037  | -3.7296687 | 0.0576023  |
| C | -6.5298595  | -6.0501560 | 0.1055385  |
| C | -7.6349162  | -5.0706581 | 0.1565051  |
| C | -9.3476557  | -2.7828170 | 0.2429342  |
| C | -9.8582250  | -4.1180533 | 0.3263256  |
| C | -9.0298057  | -5.2360294 | 0.2877006  |
| C | -9.7592744  | -0.3442563 | 0.2429107  |
| C | -10.2245366 | -1.6707175 | 0.3048594  |
| C | 3.1751983   | 4.2647473  | -0.3292456 |
| C | 4.2818664   | 3.2856174  | -0.3387168 |
| C | -6.3100126  | -7.4422911 | 0.1807646  |
| C | -4.9736646  | -8.0028628 | 0.1295909  |
| C | -4.6690980  | -9.4052840 | 0.2185346  |
| C | -2.2167438  | -8.9778100 | 0.0716198  |
| C | -3.3595773  | -9.8552282 | 0.1868279  |
| C | 0.2185980   | -8.5687114 | -0.0288434 |
| C | 2.6695901   | -8.2525559 | -0.0910753 |
| C | -0.8900528  | -9.4453938 | 0.0634869  |
| C | 1.5564194   | -9.0815039 | -0.0195206 |
| C | 4.8716461   | -5.5320907 | -0.2375754 |
| C | 5.4328722   | -4.1972173 | -0.2820677 |
| C | 5.9979029   | 0.9984151  | -0.3323798 |
| C | 6.4100041   | -1.4400248 | -0.3156749 |
| C | 6.8384667   | -3.8955559 | -0.2524601 |
| C | 7.2900268   | -2.5862248 | -0.2721349 |
| C | 6.8776689   | -0.1129521 | -0.3118162 |
| C | 5.6825349   | 3.4523862  | -0.3144522 |
| C | 6.5122544   | 2.3346741  | -0.3130773 |
| C | 2.9598874   | 5.6586624  | -0.2759410 |
| C | 1.6226778   | 6.2190849  | -0.2469495 |
| C | -1.1327416  | 7.1949337  | -0.1411579 |
| C | 1.3236488   | 7.6237752  | -0.1767756 |
| C | 0.0146353   | 8.0739652  | -0.1296813 |
| C | -3.5688790  | 6.7855531  | -0.0625287 |
| C | -2.4573093  | 7.6634048  | -0.0706823 |
| C | -5.8518486  | 5.0679830  | -0.0089329 |
| C | -6.8309484  | 3.9626582  | 0.0175761  |
| C | -8.7841284  | 2.4125499  | 0.1559171  |
| C | -8.2222796  | 3.7477469  | 0.1328409  |
| C | -10.1841227 | 2.1123573  | 0.2880562  |
| C | -10.6349366 | 0.8031440  | 0.3254246  |
| C | -4.9032766  | 7.2994050  | 0.0280753  |
| C | -6.0178386  | 6.4697202  | 0.0574164  |
| H | -9.4622693  | -6.2453581 | 0.3614399  |
| H | -10.9464880 | -4.2470182 | 0.4295316  |
| H | -11.3047429 | -1.8579731 | 0.4131295  |
| H | -11.7140870 | 0.6098708  | 0.4300728  |
| H | -10.9087380 | 2.9383186  | 0.3647389  |
| H | -8.9228385  | 4.5937362  | 0.2205334  |
| H | -7.0265971  | 6.9032194  | 0.1340092  |
| H | -5.0309580  | 8.3913700  | 0.0806591  |

|    |            |             |            |
|----|------------|-------------|------------|
| H  | -2.6424611 | 8.7476990   | -0.0112144 |
| H  | -0.1785280 | 9.1567860   | -0.0737373 |
| H  | 2.1497100  | 8.3520649   | -0.1564624 |
| H  | 3.8055959  | 6.3644022   | -0.2441600 |
| H  | 6.1186859  | 4.4626175   | -0.2939477 |
| H  | 7.6050467  | 2.4648288   | -0.2916928 |
| H  | 7.9627167  | 0.0754919   | -0.2839198 |
| H  | 8.3737043  | -2.3917428  | -0.2459198 |
| H  | 1.6883115  | -10.1718720 | 0.0522212  |
| H  | -0.7002583 | -10.5278800 | 0.1389815  |
| H  | -3.1618132 | -10.9361993 | 0.2597986  |
| H  | -5.4910435 | -10.1318256 | 0.3171708  |
| H  | -7.1504811 | -8.1459205  | 0.2938728  |
| H  | 7.5671185  | -4.7204275  | -0.2097027 |
| C  | 3.4758353  | -5.7482176  | -0.2516360 |
| H  | 5.5770810  | -6.3765374  | -0.1789621 |
| C  | 2.4981740  | -6.8528179  | -0.1811855 |
| H  | 3.6815806  | -8.6850103  | -0.0754893 |
| Fe | -1.6845664 | -0.8949813  | -0.3136646 |

### 1.5. FeN<sub>4</sub>, Pyridinic-1

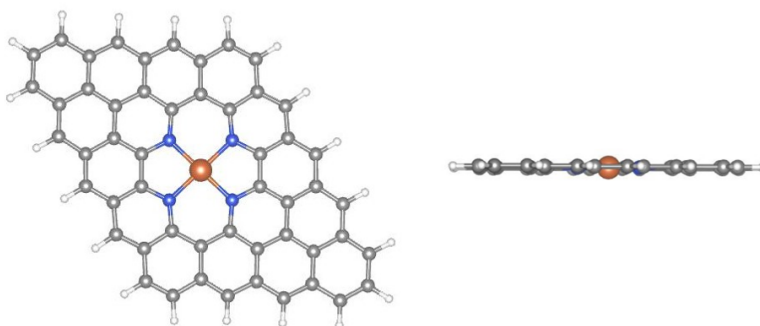

77

|   |            |            |            |
|---|------------|------------|------------|
| C | -2.0120414 | 2.8995523  | 0.0113963  |
| C | -2.1485095 | 1.4871764  | -0.0163038 |
| C | -0.7077078 | 3.4614745  | 0.0901956  |
| N | 0.2739307  | 1.2626476  | 0.1123558  |
| C | -0.9828935 | 0.7259903  | 0.0361187  |
| C | -1.0670519 | -0.6888047 | 0.0108661  |
| N | 0.1175316  | -1.3616774 | 0.0660201  |
| C | 0.1592138  | -2.7143707 | 0.0489413  |
| C | -2.3317757 | -1.3204351 | -0.0678380 |
| C | -2.2988278 | -2.7321150 | -0.0873302 |
| C | -1.1057822 | -3.4251493 | -0.0315977 |
| C | -3.4397304 | 0.8592367  | -0.0959233 |
| C | -3.5053401 | -0.5419839 | -0.1204794 |
| H | -4.4753655 | -1.0403077 | -0.1810362 |
| H | -3.2356551 | -3.2921180 | -0.1476518 |
| C | 1.7597825  | 3.2043988  | 0.2207121  |
| C | 2.9899433  | 2.4645014  | 0.2773416  |
| N | 3.0316151  | 1.1118049  | 0.2604592  |
| C | 4.2549996  | 3.1752953  | 0.3567907  |

|   |            |            |            |
|---|------------|------------|------------|
| C | 5.4480247  | 2.4822557  | 0.4128966  |
| C | 5.4808697  | 1.0705489  | 0.3952840  |
| C | 4.2161569  | 0.4389212  | 0.3163774  |
| H | 6.3848901  | 3.0422693  | 0.4725234  |
| C | 1.8336257  | 4.6496547  | 0.2452413  |
| C | 3.1122624  | 5.3076685  | 0.3243893  |
| C | 4.2649428  | 4.6117475  | 0.3775358  |
| H | 3.1188024  | 6.3998396  | 0.3403836  |
| H | 5.2306923  | 5.1185883  | 0.4375459  |
| C | -0.5877438 | 4.8872866  | 0.1168023  |
| C | 0.7072951  | 5.4436054  | 0.1952259  |
| H | 0.8189039  | 6.5296532  | 0.2169190  |
| C | 4.1319240  | -0.9758931 | 0.2924779  |
| N | 2.8751527  | -1.5125376 | 0.2152832  |
| C | 2.6977407  | -2.8613933 | 0.1879627  |
| C | 5.2973690  | -1.7371218 | 0.3479889  |
| C | 5.1607611  | -3.1495309 | 0.3227890  |
| C | 3.8565262  | -3.7114285 | 0.2422004  |
| C | 6.6543020  | 0.2920639  | 0.4503099  |
| C | 6.5885255  | -1.1091983 | 0.4287691  |
| H | 7.6243238  | 0.7903865  | 0.5109337  |
| C | 1.3892918  | -3.4542894 | 0.1070601  |
| C | 3.7364590  | -5.1372652 | 0.2174343  |
| C | 2.4415630  | -5.6935492 | 0.1364434  |
| C | 1.3154098  | -4.8995548 | 0.0832291  |
| H | 2.3299040  | -6.7796099 | 0.1156745  |
| C | 0.0369083  | -5.5575346 | 0.0016451  |
| C | -1.1156746 | -4.8615884 | -0.0532540 |
| H | 0.0303707  | -6.6497052 | -0.0143882 |
| H | -2.0813291 | -5.3684050 | -0.1149774 |
| C | 0.4512595  | 2.6114835  | 0.1411637  |
| C | 7.7242441  | -1.9496552 | 0.4828248  |
| C | -4.5757053 | 1.6996314  | -0.1453735 |
| C | -3.1649082 | 3.7113390  | -0.0397685 |
| C | -4.4642308 | 3.1026108  | -0.1190023 |
| C | -1.7421713 | 5.6841551  | 0.0652745  |
| C | -3.0284582 | 5.1310917  | -0.0124349 |
| C | -5.5987383 | 3.9464706  | -0.1685426 |
| C | -4.2072172 | 5.9281055  | -0.0653216 |
| C | -5.4586439 | 5.3353319  | -0.1414236 |
| H | -5.5688064 | 1.2473768  | -0.2059045 |
| H | -6.3509894 | 5.9646974  | -0.1809055 |
| H | -6.5917535 | 3.4949978  | -0.2287966 |
| H | -4.1102658 | 7.0160871  | -0.0448977 |
| H | -1.6301123 | 6.7710571  | 0.0867831  |
| C | 6.3133694  | -3.9613792 | 0.3785816  |
| C | 7.6125703  | -3.3526810 | 0.4600136  |
| C | 4.8906297  | -5.9341945 | 0.2735558  |
| C | 6.1767622  | -5.3811676 | 0.3540360  |
| H | 4.7784695  | -7.0211205 | 0.2538669  |
| H | 8.7172802  | -1.4974171 | 0.5445415  |
| C | 8.7467437  | -4.1966185 | 0.5155106  |
| C | 7.3551969  | -6.1782562 | 0.4126938  |
| C | 8.6064651  | -5.5855209 | 0.4916453  |

|    |           |            |           |
|----|-----------|------------|-----------|
| H  | 7.2581074 | -7.2662687 | 0.3947102 |
| H  | 9.7396459 | -3.7451733 | 0.5778043 |
| H  | 9.4985407 | -6.2149490 | 0.5359348 |
| Fe | 1.5745808 | -0.1249346 | 0.1631081 |

### 1.6. $\text{FeN}_4$ , Pyridinic-1L

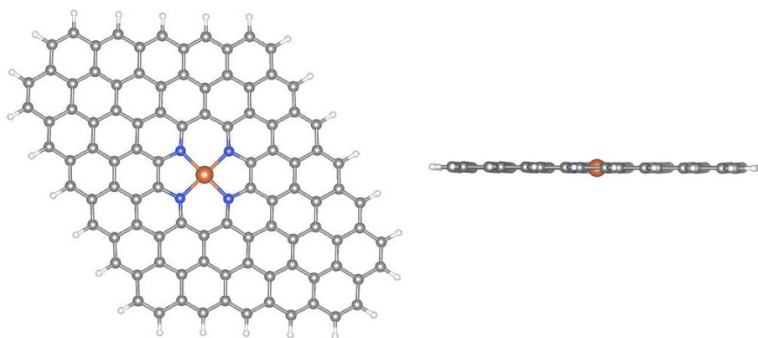

129

|   |            |            |            |
|---|------------|------------|------------|
| C | -1.9739928 | 2.9094251  | -0.6223372 |
| C | -2.0881284 | 1.4938055  | -0.6422545 |
| C | -0.6795718 | 3.4938291  | -0.4148923 |
| N | 0.3300925  | 1.2858443  | -0.2544260 |
| C | -0.9214254 | 0.7333147  | -0.4559816 |
| C | -0.9992969 | -0.6842727 | -0.4687852 |
| N | 0.1834063  | -1.3652755 | -0.2772749 |
| C | 0.1959098  | -2.7429575 | -0.2735588 |
| C | -2.2468372 | -1.3218820 | -0.6696750 |
| C | -2.2727355 | -2.7397136 | -0.6739675 |
| C | -1.0575008 | -3.4522747 | -0.4768245 |
| C | -3.3550461 | 0.8551152  | -0.8452821 |
| C | -3.4317228 | -0.5590981 | -0.8590748 |
| C | 1.7778501  | 3.2817439  | -0.0204635 |
| C | 2.9991055  | 2.5268577  | 0.1778130  |
| N | 3.0118126  | 1.1492279  | 0.1807542  |
| C | 4.2524907  | 3.2362135  | 0.3811920  |
| C | 5.4672149  | 2.5236300  | 0.5812016  |
| C | 5.4408752  | 1.1057977  | 0.5798892  |
| C | 4.1938420  | 0.4681906  | 0.3757177  |
| C | 1.8510443  | 4.7330198  | -0.0094680 |
| C | 3.1106936  | 5.4094450  | 0.1924740  |
| C | 4.2954250  | 4.6694342  | 0.3854520  |
| C | -0.5855737 | 4.9234521  | -0.3992757 |
| C | 0.6863101  | 5.5359338  | -0.1964894 |
| C | 4.1155542  | -0.9494325 | 0.3653952  |
| N | 2.8645525  | -1.5019401 | 0.1604842  |
| C | 2.7112685  | -2.8758851 | 0.1391130  |
| C | 5.2808919  | -1.7099119 | 0.5601054  |
| C | 5.1658854  | -3.1255353 | 0.5457573  |
| C | 3.8722431  | -3.7099298 | 0.3334960  |
| C | 6.6244893  | 0.3430119  | 0.7769771  |
| C | 6.5470141  | -1.0712084 | 0.7681057  |
| C | 1.4166748  | -3.4978585 | -0.0724090 |

|    |            |            |            |
|----|------------|------------|------------|
| C  | 3.7774018  | -5.1395671 | 0.3229855  |
| C  | 2.5065004  | -5.7520419 | 0.1141587  |
| C  | 1.3430440  | -4.9491277 | -0.0808612 |
| C  | 0.0840619  | -5.6255320 | -0.2867958 |
| C  | -1.1002626 | -4.8854853 | -0.4822944 |
| C  | 0.4827901  | 2.6597346  | -0.2291020 |
| C  | 7.7119761  | -1.8615474 | 0.9642109  |
| C  | -4.5219316 | 1.6454724  | -1.0295182 |
| C  | -3.1397964 | 3.6958271  | -0.8069513 |
| C  | -4.4174492 | 3.0663191  | -1.0105013 |
| C  | -1.7595792 | 5.7240427  | -0.5857557 |
| C  | -3.0361241 | 5.1192217  | -0.7886585 |
| C  | -5.5832423 | 3.8636979  | -1.1929234 |
| C  | -4.2061832 | 5.9177577  | -0.9724521 |
| C  | -5.4795852 | 5.2917658  | -1.1738495 |
| C  | 6.3297694  | -3.9119236 | 0.7422270  |
| C  | 7.6063698  | -3.2824085 | 0.9522536  |
| C  | 4.9494956  | -5.9401320 | 0.5212619  |
| C  | 6.2249239  | -5.3353188 | 0.7311589  |
| C  | 8.7696554  | -4.0797649 | 1.1502068  |
| C  | 7.3925108  | -6.1338210 | 0.9302062  |
| C  | 8.6645650  | -5.5078259 | 1.1399747  |
| Fe | 1.5977002  | -0.1082045 | -0.0492879 |
| C  | 5.5685595  | 5.3452273  | 0.5905463  |
| C  | 6.7363808  | 3.1909176  | 0.7875830  |
| C  | 6.7366189  | 4.6154090  | 0.7832115  |
| C  | 7.8914066  | 1.0032214  | 0.9844577  |
| C  | 7.9037237  | 2.4280268  | 0.9819384  |
| C  | 5.5919369  | 6.7878902  | 0.5901659  |
| C  | 4.4486848  | 7.5096427  | 0.4037065  |
| C  | 3.1751054  | 6.8614238  | 0.2002738  |
| H  | 4.4716876  | 8.6101957  | 0.4046615  |
| H  | 6.5583264  | 7.2915299  | 0.7450550  |
| H  | 7.6864365  | 5.1508802  | 0.9368757  |
| H  | 8.8590907  | 2.9531266  | 1.1377383  |
| C  | 2.0224975  | 7.6090357  | 0.0145257  |
| C  | -0.3951677 | 7.7546499  | -0.3696027 |
| C  | -1.6688576 | 7.1668702  | -0.5709423 |
| C  | 0.7610720  | 6.9841495  | -0.1856401 |
| H  | 2.0786975  | 8.7085487  | 0.0217249  |
| H  | -0.3097244 | 8.8524655  | -0.3566763 |
| C  | -2.8360936 | 7.9432185  | -0.7547438 |
| C  | -4.1016225 | 7.3544048  | -0.9542882 |
| H  | -2.7512834 | 9.0410783  | -0.7407511 |
| C  | -5.2952513 | 8.1270067  | -1.1407124 |
| C  | -6.5203728 | 7.5171475  | -1.3332682 |
| C  | -6.6512408 | 6.0949681  | -1.3562678 |
| H  | -5.2175609 | 9.2249887  | -1.1273428 |
| C  | -7.9094354 | 5.4409560  | -1.5548360 |
| C  | -6.8632343 | 3.2242934  | -1.3955786 |
| C  | -5.8003667 | 0.9979204  | -1.2328557 |
| C  | -4.6993935 | -1.2193073 | -1.0618656 |
| C  | -3.5421415 | -3.4069576 | -0.8786528 |
| C  | -2.3730536 | -5.5612609 | -0.6894085 |

---

|   |            |            |            |
|---|------------|------------|------------|
| C | -8.0149934 | 4.0656187  | -1.5743866 |
| C | -6.9448985 | 1.8180503  | -1.4115759 |
| C | -5.8527427 | -0.4234271 | -1.2437690 |
| C | -4.7107629 | -2.6440819 | -1.0654208 |
| C | -3.5415801 | -4.8314348 | -0.8792049 |
| H | -8.9941409 | 3.5867681  | -1.7288033 |
| H | -7.9253743 | 1.3413149  | -1.5668685 |
| H | -6.8248671 | -0.9172053 | -1.3986503 |
| H | -5.6664714 | -3.1691787 | -1.2188729 |
| H | -4.4913477 | -5.3669062 | -1.0330538 |
| C | 0.0195678  | -7.0774988 | -0.2942836 |
| C | 2.4311556  | -7.2002471 | 0.1066708  |
| C | 4.8577741  | -7.3829654 | 0.5124513  |
| C | 7.2866565  | -7.5704769 | 0.9199621  |
| C | -1.2530741 | -7.7257051 | -0.5034606 |
| C | -2.3959257 | -7.0039260 | -0.6922712 |
| H | -1.2758754 | -8.8262630 | -0.5057568 |
| H | -3.3617795 | -7.5075477 | -0.8504883 |
| C | 1.1709861  | -7.8251193 | -0.1011776 |
| C | 3.5855313  | -7.9707456 | 0.3022967  |
| C | 9.8333240  | -6.3110066 | 1.3403801  |
| C | 8.4774535  | -8.3430469 | 1.1238736  |
| C | 9.7009991  | -7.7331743 | 1.3262618  |
| H | 1.1145821  | -8.9246413 | -0.1072533 |
| H | 3.4995666  | -9.0685748 | 0.2924729  |
| C | 6.0226376  | -8.1592939 | 0.7110627  |
| H | 5.9369768  | -9.2571673 | 0.7022087  |
| H | 8.3987991  | -9.4410370 | 1.1164744  |
| C | 11.0901345 | -5.6569815 | 1.5474998  |
| C | 11.1972111 | -4.2816424 | 1.5577877  |
| C | 10.0483579 | -3.4403457 | 1.3609917  |
| C | 8.9893425  | -1.2139797 | 1.1743244  |
| C | 9.0429132  | 0.2073715  | 1.1777987  |
| H | 10.0143725 | 0.7011727  | 1.3369860  |
| C | 10.1314568 | -2.0340995 | 1.3680677  |
| H | 11.1110262 | -1.5573395 | 1.5291320  |
| H | 12.1752793 | -3.8027905 | 1.7190520  |
| H | -7.4249445 | 8.1293398  | -1.4736874 |
| H | 11.9847652 | -6.2805784 | 1.7009856  |
| H | -8.8063382 | 6.0645729  | -1.6942008 |
| H | 10.6031572 | -8.3453729 | 1.4815331  |

1.7.  $FeN_4$ , Pyridinic-2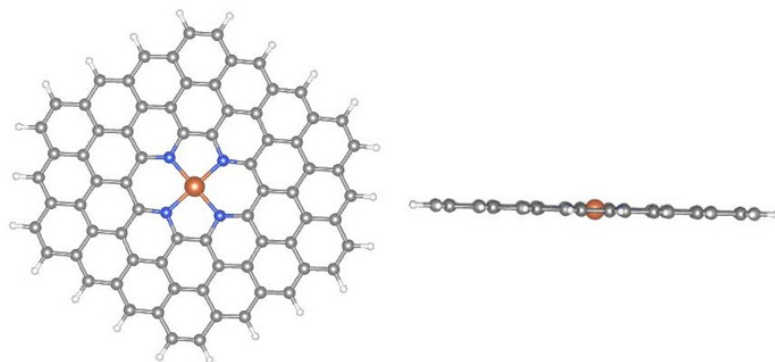

101

|   |            |            |            |
|---|------------|------------|------------|
| C | -1.9603273 | 3.4144163  | -0.6477461 |
| C | -2.2071138 | 2.0203811  | -0.6527047 |
| C | -0.6261131 | 3.8800795  | -0.4274082 |
| N | 0.1818117  | 1.5955461  | -0.2236130 |
| C | -1.1155422 | 1.1530374  | -0.4382329 |
| C | -1.3169664 | -0.2418660 | -0.4350429 |
| N | -0.1977285 | -1.0323212 | -0.2176838 |
| C | -0.3101748 | -2.4011539 | -0.1996719 |
| C | -2.6095098 | -0.7659303 | -0.6460397 |
| C | -2.7672242 | -2.1727873 | -0.6343898 |
| C | -1.6190670 | -2.9958722 | -0.4114470 |
| C | -3.5197905 | 1.5000831  | -0.8674329 |
| C | -3.7214765 | 0.1034686  | -0.8639907 |
| C | 1.8027711  | 3.4427915  | 0.0085867  |
| C | 2.9475771  | 2.5823481  | 0.2321282  |
| N | 2.8351003  | 1.2135174  | 0.2503029  |
| C | 4.2564592  | 3.1770697  | 0.4439698  |
| C | 5.4045830  | 2.3539870  | 0.6671083  |
| C | 5.2468317  | 0.9471329  | 0.6789598  |
| C | 3.9543020  | 0.4230666  | 0.4678770  |
| C | 2.0104623  | 4.8809470  | 0.0050773  |
| C | 3.3115235  | 5.4435718  | 0.2161326  |
| C | 4.4317821  | 4.5899678  | 0.4350042  |
| C | -0.3945039 | 5.2848616  | -0.4254087 |
| C | 0.9216417  | 5.7876670  | -0.2096751 |
| C | 3.7528731  | -0.9718366 | 0.4710841  |
| N | 2.4555590  | -1.4143499 | 0.2562410  |
| C | 2.1762637  | -2.7591522 | 0.2442118  |
| C | 4.8444230  | -1.8391769 | 0.6856748  |
| C | 4.5976674  | -3.2332142 | 0.6805312  |
| C | 3.2634932  | -3.6988805 | 0.4599716  |
| C | 6.3587735  | 0.0777348  | 0.8970485  |
| C | 6.1570776  | -1.3188782 | 0.9005299  |
| C | 0.8346503  | -3.2615981 | 0.0237519  |
| C | 3.0319205  | -5.1036661 | 0.4577675  |
| C | 1.7158172  | -5.6064768 | 0.2417983  |
| C | 0.6269907  | -4.6997567 | 0.0270841  |
| C | -0.6740540 | -5.2623834 | -0.1840602 |

|   |            |            |            |
|---|------------|------------|------------|
| C | -1.7943516 | -4.4087745 | -0.4027019 |
| C | 0.4611339  | 2.9403464  | -0.2117453 |
| C | 7.2566163  | -2.2281274 | 1.1172679  |
| C | 7.0088260  | -3.6005089 | 1.1115557  |
| C | 5.4299914  | -5.5166651 | 0.8877978  |
| C | 4.1350035  | -6.0111856 | 0.6750052  |
| C | 5.6984497  | -4.1333679 | 0.8972330  |
| C | 3.8799413  | -7.4258951 | 0.6687620  |
| C | 2.6182974  | -7.9119252 | 0.4618940  |
| C | 1.5028581  | -7.0313346 | 0.2436015  |
| C | 0.2161799  | -7.5446214 | 0.0336390  |
| C | -0.8729165 | -6.6892711 | -0.1793421 |
| C | -2.1920912 | -7.2193295 | -0.3940645 |
| C | -3.1093296 | -4.9681290 | -0.6160005 |
| C | -4.0779149 | -2.7257382 | -0.8471678 |
| C | -5.1842047 | -1.8449125 | -1.0643814 |
| C | -5.0335245 | -0.4585598 | -1.0769226 |
| C | -4.6193327 | 2.4093317  | -1.0841646 |
| C | -5.9271473 | 1.8264151  | -1.2961717 |
| C | -3.0611129 | 4.3145715  | -0.8644402 |
| C | -4.3715337 | 3.7817144  | -1.0785124 |
| C | -1.4975912 | 6.1923822  | -0.6426318 |
| C | -2.7926390 | 5.6978687  | -0.8550900 |
| C | 1.1346470  | 7.2125180  | -0.2117395 |
| C | 0.0192250  | 8.0931050  | -0.4301377 |
| C | 3.5104309  | 6.8704526  | 0.2111552  |
| C | 2.4213514  | 7.7257998  | -0.0019254 |
| C | 5.7467688  | 5.1493213  | 0.6482621  |
| C | 5.9024205  | 6.5783376  | 0.6352585  |
| C | 4.8296230  | 7.4005074  | 0.4257824  |
| C | 6.8491396  | 4.3095943  | 0.8637413  |
| C | 6.7152815  | 2.9069372  | 0.8798545  |
| C | 7.6708275  | 0.6397613  | 1.1099586  |
| C | 7.8215278  | 2.0261132  | 1.0973147  |
| C | 8.7604035  | -0.2883440 | 1.3257649  |
| C | 8.5644359  | -1.6452145 | 1.3292520  |
| H | 9.7634181  | 0.1208558  | 1.4893474  |
| H | 9.4106938  | -2.3207857 | 1.4955186  |
| H | 7.8356457  | -4.3005297 | 1.2749233  |
| H | 6.2497107  | -6.2254237 | 1.0501055  |
| H | 4.7220935  | -8.1063158 | 0.8339938  |
| H | 2.4302979  | -8.9909806 | 0.4582607  |
| H | 0.0597765  | -8.6287144 | 0.0362869  |
| C | -3.2649168 | -6.3971550 | -0.6033744 |
| H | -2.3167360 | -8.3074946 | -0.3855239 |
| H | -4.2653513 | -6.8121166 | -0.7658488 |
| C | -4.2117523 | -4.1283961 | -0.8311755 |
| H | -5.1987435 | -4.5768956 | -0.9902681 |
| H | -6.1755653 | -2.2830135 | -1.2246228 |
| C | -6.1231159 | 0.4695447  | -1.2926506 |
| H | -7.1261554 | 0.0603477  | -1.4560752 |
| H | -6.7733757 | 2.5019798  | -1.4626265 |
| H | -5.1983864 | 4.4817404  | -1.2417169 |
| H | -3.6124226 | 6.4066390  | -1.0170432 |



|    |            |           |            |
|----|------------|-----------|------------|
| C  | -1.2424748 | 7.6070841 | -0.6366895 |
| H  | -2.0846307 | 8.2875071 | -0.8019033 |
| H  | 0.2073029  | 9.1721483 | -0.4269567 |
| H  | 2.5777646  | 8.8098909 | -0.0046316 |
| H  | 6.9029067  | 6.9932923 | 0.7974434  |
| H  | 4.9543013  | 8.4886672 | 0.4170498  |
| H  | 7.8360792  | 4.7581033 | 1.0231506  |
| H  | 8.8128703  | 2.4642172 | 1.2576865  |
| Fe | 1.3187026  | 0.0905956 | 0.0162157  |

### 1.8. $\text{FeN}_4$ , Pyridinic-2L

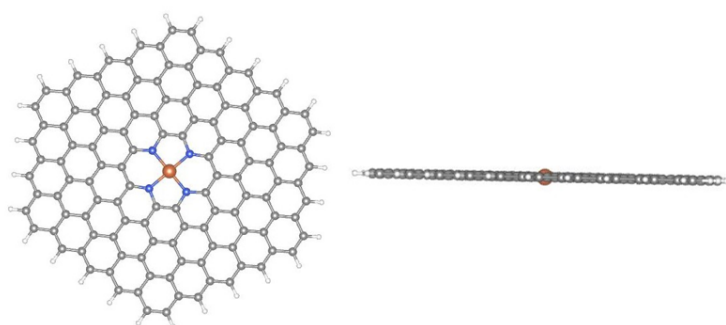

157

|   |            |            |            |
|---|------------|------------|------------|
| C | -1.9596506 | 3.4144013  | -0.6539982 |
| C | -2.1984721 | 2.0204282  | -0.6572563 |
| C | -0.6271373 | 3.8874931  | -0.4300876 |
| N | 0.1811351  | 1.6007786  | -0.2217840 |
| C | -1.1110908 | 1.1529651  | -0.4392528 |
| C | -1.3137596 | -0.2459745 | -0.4352455 |
| N | -0.2017426 | -1.0408484 | -0.2142001 |
| C | -0.3222115 | -2.4140166 | -0.1953490 |
| C | -2.6028722 | -0.7703012 | -0.6490497 |
| C | -2.7695443 | -2.1746651 | -0.6375752 |
| C | -1.6259109 | -3.0052126 | -0.4101413 |
| C | -3.5083117 | 1.4984519  | -0.8748910 |
| C | -3.7108359 | 0.1007181  | -0.8706949 |
| C | 1.7948705  | 3.4588957  | 0.0140818  |
| C | 2.9356203  | 2.5938335  | 0.2429554  |
| N | 2.8153255  | 1.2206048  | 0.2606072  |
| C | 4.2389718  | 3.1850841  | 0.4597208  |
| C | 5.3823261  | 2.3545831  | 0.6887990  |
| C | 5.2157286  | 0.9501978  | 0.6997538  |
| C | 3.9270673  | 0.4257855  | 0.4835063  |
| C | 2.0030448  | 4.8965554  | 0.0106428  |
| C | 3.3079885  | 5.4580311  | 0.2277510  |
| C | 4.4253544  | 4.6001978  | 0.4522246  |
| C | -0.4043856 | 5.2973682  | -0.4298669 |
| C | 0.9107998  | 5.8040642  | -0.2097614 |
| C | 3.7243807  | -0.9731490 | 0.4874726  |
| N | 2.4325379  | -1.4210306 | 0.2681377  |
| C | 2.1581395  | -2.7720165 | 0.2582493  |
| C | 4.8113696  | -1.8405390 | 0.7077659  |

---

|   |            |            |            |
|---|------------|------------|------------|
| C | 4.5725295  | -3.2344951 | 0.7045466  |
| C | 3.2402954  | -3.7076357 | 0.4791101  |
| C | 6.3232878  | 0.0792289  | 0.9237077  |
| C | 6.1207604  | -1.3185007 | 0.9278684  |
| C | 0.8185808  | -3.2790732 | 0.0333216  |
| C | 3.0174788  | -5.1174869 | 0.4792644  |
| C | 1.7024438  | -5.6241999 | 0.2583118  |
| C | 0.6102669  | -4.7166987 | 0.0375629  |
| C | -0.6948178 | -5.2781555 | -0.1787489 |
| C | -1.8123774 | -4.4203029 | -0.4021195 |
| C | 0.4553165  | 2.9518315  | -0.2108511 |
| C | 7.2143138  | -2.2052912 | 1.1493525  |
| C | 6.9877070  | -3.6064190 | 1.1483898  |
| C | 5.4400183  | -5.5223025 | 0.9246783  |
| C | 4.1201357  | -6.0186793 | 0.7021332  |
| C | 5.6701864  | -4.1219583 | 0.9266001  |
| C | 3.9013719  | -7.4293638 | 0.7023757  |
| C | 2.5941514  | -7.9404953 | 0.4828828  |
| C | 1.4963420  | -7.0475244 | 0.2617901  |
| C | 0.1950350  | -7.5831648 | 0.0451647  |
| C | -0.9010526 | -6.7014588 | -0.1746841 |
| C | -2.2074917 | -7.2473734 | -0.3909014 |
| C | -3.1259652 | -4.9726879 | -0.6191107 |
| C | -4.0745921 | -2.7152712 | -0.8529649 |
| C | -5.1922251 | -1.8481739 | -1.0759973 |
| C | -5.0118211 | -0.4403634 | -1.0851601 |
| C | -4.6023309 | 2.3853080  | -1.0937868 |
| C | -5.9099662 | 1.8483650  | -1.3096449 |
| C | -3.0577135 | 4.3019225  | -0.8738276 |
| C | -4.3756826 | 3.7864369  | -1.0931185 |
| C | -1.5073107 | 6.1986009  | -0.6512644 |
| C | -2.8275263 | 5.7022740  | -0.8719691 |
| C | 1.1168796  | 7.2273991  | -0.2130704 |
| C | 0.0189554  | 8.1203813  | -0.4335440 |
| C | 3.5141803  | 6.8813463  | 0.2239386  |
| C | 2.4181948  | 7.7630349  | 0.0035045  |
| C | 5.7386015  | 5.1526478  | 0.6711251  |
| C | 5.9290861  | 6.5674154  | 0.6640658  |
| C | 4.8204100  | 7.4273011  | 0.4413276  |
| C | 6.8635785  | 4.3033578  | 0.8970768  |
| C | 6.6869179  | 2.8952715  | 0.9067490  |
| C | 7.6237750  | 0.6204016  | 1.1409623  |
| C | 7.8041263  | 2.0282250  | 1.1321625  |
| C | 8.7248738  | -0.2642433 | 1.3638831  |
| C | 8.5214125  | -1.6682675 | 1.3681902  |
| C | -3.3164639 | -6.3874446 | -0.6119863 |
| C | -4.2512918 | -4.1233393 | -0.8430486 |
| C | -6.1134273 | 0.4443422  | -1.3052667 |
| C | -1.2885000 | 7.6092838  | -0.6517233 |
| C | -4.6366383 | -6.9381006 | -0.8296869 |
| C | -4.7951863 | -8.3713792 | -0.8165993 |
| C | -2.4034923 | -8.6788599 | -0.3848044 |
| C | -3.7295063 | -9.2009260 | -0.6044531 |
| H | -5.7968459 | -8.7824882 | -0.9818571 |

|   |            |             |            |
|---|------------|-------------|------------|
| H | -3.8632571 | -10.2880579 | -0.5967933 |
| C | -0.0117579 | -9.0110211  | 0.0488097  |
| C | -1.3131645 | -9.5221449  | -0.1676168 |
| H | -1.4640589 | -10.6074036 | -0.1632505 |
| C | 2.3759954  | -9.3687992  | 0.4839546  |
| C | 1.0912715  | -9.8692369  | 0.2692354  |
| C | 3.4993140  | -10.2443859 | 0.7088760  |
| C | 4.7563637  | -9.7501514  | 0.9196020  |
| C | 5.0108869  | -8.3307269  | 0.9259640  |
| H | 0.9282929  | -10.9527498 | 0.2711838  |
| H | 3.3194383  | -11.3248734 | 0.7070589  |
| H | 5.6000363  | -10.4278102 | 1.0888277  |
| C | 6.2923061  | -7.8193974  | 1.1412342  |
| C | 6.5474998  | -6.4231801  | 1.1483367  |
| H | 7.1241355  | -8.5124256  | 1.3091326  |
| C | 7.8429430  | -5.8928191  | 1.3660251  |
| C | 8.0925605  | -4.5064967  | 1.3718359  |
| H | 8.6737338  | -6.5868378  | 1.5348795  |
| C | 9.3939852  | -3.9504346  | 1.5895056  |
| C | 9.6265781  | -2.5742564  | 1.5921342  |
| H | 10.2325884 | -4.6352976  | 1.7589165  |
| C | 10.9342056 | -1.9918142  | 1.8097298  |
| C | 10.0419619 | 0.2920987   | 1.5834667  |
| C | 10.2095221 | 1.6776620   | 1.5728711  |
| C | 9.1192192  | 2.5790051   | 1.3512756  |
| C | 9.2733356  | 3.9791064   | 1.3375503  |
| C | 8.1814111  | 4.8541389   | 1.1165145  |
| C | 8.3328633  | 6.2653181   | 1.1020395  |
| C | 7.2489406  | 7.1181113   | 0.8836301  |
| C | 7.4075532  | 8.5513785   | 0.8701054  |
| C | 6.3421782  | 9.3808764   | 0.6562253  |
| C | 5.0164289  | 8.8587851   | 0.4350649  |
| C | 3.9262934  | 9.7020289   | 0.2167740  |
| C | 2.6249977  | 9.1908886   | -0.0002505 |
| C | 1.5219800  | 10.0490921  | -0.2207555 |
| C | 0.2371641  | 9.5486753   | -0.4349483 |
| C | -0.8862765 | 10.4242944  | -0.6591275 |
| C | -2.3982327 | 8.5106990   | -0.8740353 |
| C | -2.1435839 | 9.9301049   | -0.8684123 |
| C | -3.9353559 | 6.6032273   | -1.0936467 |
| C | -3.6800209 | 7.9994260   | -1.0872733 |
| C | -5.2313037 | 6.0729295   | -1.3085295 |
| C | -5.4809835 | 4.6866085   | -1.3140044 |
| C | -7.0156435 | 2.7544505   | -1.5306802 |
| C | -6.7829715 | 4.1306213   | -1.5285405 |
| C | -7.4310709 | -0.1119284  | -1.5216514 |
| C | -8.5203207 | 0.8165211   | -1.7406770 |
| C | -8.3238471 | 2.1720765   | -1.7449926 |
| C | -7.5986406 | -1.4974800  | -1.5109273 |
| C | -6.5078168 | -2.3988834  | -1.2921952 |
| C | -5.5695379 | -4.6740661  | -1.0600578 |
| C | -5.7209524 | -6.0852463  | -1.0458632 |
| C | -6.6619358 | -3.7989737  | -1.2784406 |
| C | 11.1306726 | -0.6362564  | 1.8055477  |

|    |            |            |            |
|----|------------|------------|------------|
| H  | 11.7787958 | -2.6681431 | 1.9810450  |
| H  | 12.1328747 | -0.2266712 | 1.9728886  |
| H  | 11.2082608 | 2.0971561  | 1.7392362  |
| H  | 10.2672955 | 4.4095537  | 1.5026565  |
| H  | 9.3273742  | 6.6945966  | 1.2668341  |
| H  | 8.4090097  | 8.9625415  | 1.0365017  |
| H  | 6.4759309  | 10.4680083 | 0.6487496  |
| H  | 4.0771421  | 10.7872916 | 0.2126038  |
| H  | 1.6849203  | 11.1326081 | -0.2225361 |
| H  | -0.7063331 | 11.5047716 | -0.6576293 |
| H  | -2.9874082 | 10.6077842 | -1.0368420 |
| H  | -4.5120300 | 8.6925024  | -1.2541661 |
| H  | -6.0625388 | 6.7670268  | -1.4749706 |
| H  | -7.6219421 | 4.8155471  | -1.6959630 |
| H  | -9.1689332 | 2.8484672  | -1.9136314 |
| H  | -9.5229044 | 0.4070057  | -1.9058494 |
| H  | -7.6562825 | -4.2293532 | -1.4412629 |
| H  | -6.7157244 | -6.5144680 | -1.2091374 |
| H  | -8.5977783 | -1.9169112 | -1.6749438 |
| Fe | 1.3070844  | 0.0899618  | 0.0217980  |

### 1.9. $FeN_4$ , Pyrrolic-UC1

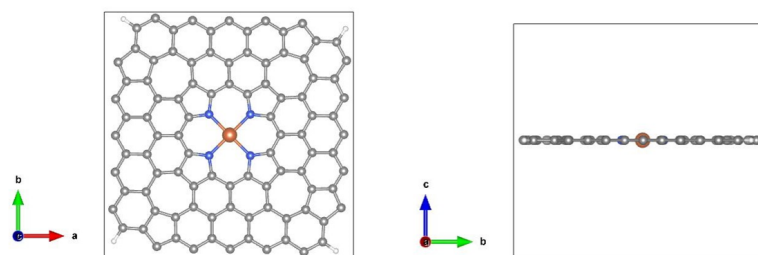

|              |               |               |   |
|--------------|---------------|---------------|---|
| 1.0          |               |               |   |
| 16.813388245 | 0.0000000000  | 0.0000000000  |   |
| 0.0000134330 | 16.8133697510 | 0.0000000000  |   |
| 0.0000000000 | 0.0000000000  | 15.3348312378 |   |
| C            | N             | Fe            | H |
| 96           | 4             | 1             | 4 |
| Cartesian    |               |               |   |
| 16.335061528 | 13.535719828  | 7.667415619   |   |
| 15.537297215 | 12.307434649  | 7.667415619   |   |
| 16.178218091 | 11.028023534  | 7.667415619   |   |
| 16.155608476 | 8.553840303   | 7.667415619   |   |
| 13.369773916 | 16.039151952  | 7.667415619   |   |
| 14.291513045 | 14.875230174  | 7.667415619   |   |
| 12.081301411 | 15.479148779  | 7.667415619   |   |
| 12.116384766 | 14.068358159  | 7.667415619   |   |
| 16.147331710 | 6.097493927   | 7.667415619   |   |
| 14.097643943 | 12.358740973  | 7.667415619   |   |
| 13.495857271 | 13.649884315  | 7.667415619   |   |
| 15.450538560 | 9.798666049   | 7.667415619   |   |
| 10.903239213 | 13.371312303  | 7.667415619   |   |
| 15.976229617 | 3.614418576   | 7.667415619   |   |

|              |              |             |
|--------------|--------------|-------------|
| 11.926122994 | 11.011365715 | 7.667415619 |
| 9.651310348  | 14.088372195 | 7.667415619 |
| 10.878247332 | 11.975389653 | 7.667415619 |
| 9.653335834  | 15.503582318 | 7.667415619 |
| 15.416207796 | 4.902840066  | 7.667415619 |
| 14.025165003 | 7.332800204  | 7.667415619 |
| 13.320789577 | 8.572395202  | 7.667415619 |
| 10.886732964 | 16.210389163 | 7.667415619 |
| 13.343834165 | 11.093473270 | 7.667415619 |
| 14.031703059 | 9.828908079  | 7.667415619 |
| 15.440331633 | 7.330820447  | 7.667415619 |
| 8.433753165  | 11.964000163 | 7.667415619 |
| 7.155231715  | 14.094945329 | 7.667415619 |
| 5.956044459  | 16.241346731 | 7.667415619 |
| 10.948473905 | 5.058046807  | 7.667415619 |
| 13.472996723 | 0.649101512  | 7.667415619 |
| 12.296003288 | 2.886501838  | 7.667415619 |
| 9.702081938  | 5.758512015  | 7.667415619 |
| 5.890641991  | 13.406879783 | 7.667415619 |
| 4.676681990  | 15.600226131 | 7.667415619 |
| 7.219140473  | 11.288541726 | 7.667415619 |
| 11.030714710 | 3.640360108  | 7.667415619 |
| 12.244676715 | 1.446881601  | 7.667415619 |
| 13.587152585 | 3.488171608  | 7.667415619 |
| 8.411752966  | 13.384106815 | 7.667415619 |
| 7.185464390  | 15.513780247 | 7.667415619 |
| 11.212481706 | 7.324674732  | 7.667415619 |
| 11.912405571 | 6.105972158  | 7.667415619 |
| 11.225498656 | 9.765041747  | 7.667415619 |
| 14.812508217 | 2.692502933  | 7.667415619 |
| 9.659489702  | 11.275588873 | 7.667415619 |
| 13.308255624 | 6.080753430  | 7.667415619 |
| 11.900785520 | 8.550415940  | 7.667415619 |
| 8.430287100  | 16.218867394 | 7.667415619 |
| 14.005379470 | 4.867690484  | 7.667415619 |
| 5.972759029  | 11.989104144 | 7.667415619 |
| 4.625281758  | 14.160593492 | 7.667415619 |
| 10.965305727 | 0.805871864  | 7.667415619 |
| 3.448408331  | 16.398026640 | 7.667415619 |
| 5.708397968  | 9.722450163  | 7.667415619 |
| 8.487482274  | 5.083223945  | 7.667415619 |
| 9.766141521  | 2.952416575  | 7.667415619 |
| 7.261715171  | 5.771667804  | 7.667415619 |
| 3.334161023  | 13.558705253 | 7.667415619 |
| 5.008679545  | 10.941199837 | 7.667415619 |
| 8.509515545  | 3.663189448  | 7.667415619 |
| 9.735867257  | 1.533527791  | 7.667415619 |
| 2.915712911  | 12.179204917 | 7.667415619 |
| 6.042985602  | 5.071800381  | 7.667415619 |
| 7.267935683  | 1.543635401  | 7.667415619 |
| 3.599994642  | 8.474549805  | 7.667415619 |
| 6.018005246  | 3.675824617  | 7.667415619 |
| 4.994999703  | 6.035758678  | 7.667415619 |
| 3.612725267  | 10.966098377 | 7.667415619 |

|              |              |             |
|--------------|--------------|-------------|
| 8.491018490  | 0.828378197  | 7.667415619 |
| 7.269975701  | 2.958844146  | 7.667415619 |
| 2.108852492  | 14.354327077 | 7.667415619 |
| 5.019991934  | 8.496702440  | 7.667415619 |
| 5.695397052  | 7.282102188  | 7.667415619 |
| 2.895700140  | 9.714133279  | 7.667415619 |
| 0.944978201  | 13.432601092 | 7.667415619 |
| 3.577302060  | 5.953533369  | 7.667415619 |
| 1.504869929  | 12.144116466 | 7.667415619 |
| 4.804869213  | 2.978806320  | 7.667415619 |
| 2.889220209  | 7.218039434  | 7.667415619 |
| 6.034529533  | 0.836795109  | 7.667415619 |
| 2.823479505  | 4.688209546  | 7.667415619 |
| 3.425355620  | 3.397116813  | 7.667415619 |
| 1.470406630  | 7.248303511  | 7.667415619 |
| 4.839950564  | 1.567983506  | 7.667415619 |
| 0.773663399  | 10.949495676 | 7.667415619 |
| 1.480443441  | 9.716080466  | 7.667415619 |
| 0.765138475  | 8.493038562  | 7.667415619 |
| 3.551549212  | 1.007984655  | 7.667415619 |
| 2.629699846  | 2.171793002  | 7.667415619 |
| 0.742795872  | 6.018946527  | 7.667415619 |
| 1.383849032  | 4.739604561  | 7.667415619 |
| 0.586118041  | 3.511319883  | 7.667415619 |
| 15.668709919 | 14.789363535 | 7.667415619 |
| 14.726726566 | 1.315297030  | 7.667415619 |
| 2.194771188  | 15.731583589 | 7.667415619 |
| 1.252508734  | 2.257666906  | 7.667415619 |
| 9.855903189  | 9.917115752  | 7.667415619 |
| 9.854081046  | 7.128152149  | 7.667415619 |
| 7.065038618  | 7.130107354  | 7.667415619 |
| 7.066895837  | 9.918941678  | 7.667415619 |
| 8.460403759  | 8.523563199  | 7.667415619 |
| 15.624866365 | 0.706337085  | 7.667415619 |
| 1.296598944  | 16.340492925 | 7.667415619 |
| 16.277708853 | 15.687472737 | 7.667415619 |
| 0.643590787  | 1.359493315  | 7.667415619 |

#### 1.10. $FeN_4$ , Pyrrolic-UC1b

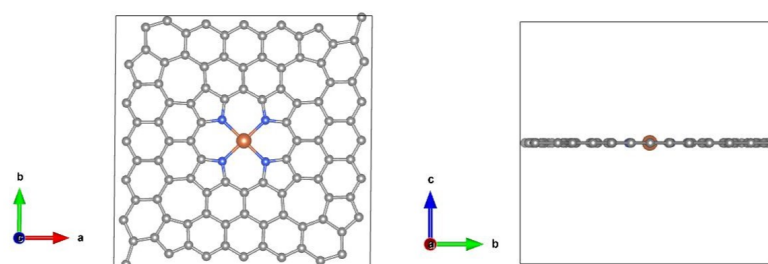

|               |               |               |
|---------------|---------------|---------------|
| 1.0           |               |               |
| 16.7742614746 | 0.0000000000  | 0.0000000000  |
| 0.1355961282  | 16.5558946196 | 0.0000000000  |
| 0.0000000000  | 0.0000000000  | 15.6096458435 |

|              |              |             |
|--------------|--------------|-------------|
| C            | N            | Fe          |
| 98           | 4            | 1           |
| Cartesian    |              |             |
| 15.736729731 | 14.946877177 | 7.804822922 |
| 16.380211526 | 13.570979360 | 7.804822922 |
| 16.216485998 | 10.949239129 | 7.804822922 |
| 15.596817047 | 12.261540116 | 7.804822922 |
| 14.349135535 | 14.722184893 | 7.804822922 |
| 13.409452174 | 15.765214535 | 7.804822922 |
| 16.191749780 | 8.424767597  | 7.804822922 |
| 15.502267735 | 9.689289304  | 7.804822922 |
| 13.576020606 | 13.472728787 | 7.804822922 |
| 14.166367744 | 12.209138626 | 7.804822922 |
| 12.125560094 | 15.215481440 | 7.804822922 |
| 12.183297282 | 13.833263116 | 7.804822922 |
| 16.183846455 | 5.929820873  | 7.804822922 |
| 15.491464055 | 7.179832059  | 7.804822922 |
| 14.091604548 | 9.680542236  | 7.804822922 |
| 10.961577200 | 15.940499305 | 7.804822922 |
| 13.404103216 | 10.942874216 | 7.804822922 |
| 15.478915745 | 4.718480235  | 7.804822922 |
| 14.088210406 | 7.166060657  | 7.804822922 |
| 13.396354713 | 8.417390219  | 7.804822922 |
| 10.961108244 | 13.151189171 | 7.804822922 |
| 16.029154046 | 3.399724041  | 7.804822922 |
| 11.988237267 | 10.842609567 | 7.804822922 |
| 9.721839317  | 15.253794269 | 7.804822922 |
| 10.925471553 | 11.777110041 | 7.804822922 |
| 9.709517572  | 13.856161014 | 7.804822922 |
| 14.087230725 | 4.674759697  | 7.804822922 |
| 8.517545028  | 15.968619392 | 7.804822922 |
| 13.382092692 | 5.900736675  | 7.804822922 |
| 11.983253266 | 8.399647407  | 7.804822922 |
| 11.296521216 | 9.598428937  | 7.804822922 |
| 14.926714912 | 2.441880865  | 7.804822922 |
| 9.708447724  | 11.080767836 | 7.804822922 |
| 13.696740494 | 3.270889074  | 7.804822922 |
| 14.931051147 | 0.979537045  | 7.804822922 |
| 8.462189969  | 13.171158222 | 7.804822922 |
| 11.985659232 | 5.965995782  | 7.804822922 |
| 11.295618141 | 7.190947467  | 7.804822922 |
| 7.257350885  | 15.286081647 | 7.804822922 |
| 8.479998333  | 11.761246112 | 7.804822922 |
| 7.209434667  | 13.884695561 | 7.804822922 |
| 6.038094943  | 16.013506338 | 7.804822922 |
| 12.357540049 | 2.780349669  | 7.804822922 |
| 13.523978470 | 0.557215137  | 7.804822922 |
| 11.008937493 | 4.953040107  | 7.804822922 |
| 12.293187033 | 1.369357005  | 7.804822922 |
| 11.097641282 | 3.548610705  | 7.804822922 |
| 7.253600419  | 11.119442823 | 7.804822922 |
| 9.765786164  | 5.666536494  | 7.804822922 |
| 5.921553151  | 13.237224045 | 7.804822922 |
| 4.726083770  | 15.416402500 | 7.804822922 |

|              |              |             |
|--------------|--------------|-------------|
| 6.010262110  | 11.832876547 | 7.804822922 |
| 4.661692858  | 14.005421678 | 7.804822922 |
| 3.495365896  | 16.228614740 | 7.804822922 |
| 10.981133541 | 0.772335320  | 7.804822922 |
| 9.809756163  | 2.901126607  | 7.804822922 |
| 8.539409249  | 5.024672516  | 7.804822922 |
| 5.723736027  | 9.595163589  | 7.804822922 |
| 9.761846340  | 1.499788751  | 7.804822922 |
| 8.557095633  | 3.614760160  | 7.804822922 |
| 5.033523294  | 10.819972186 | 7.804822922 |
| 7.311110755  | 5.705385653  | 7.804822922 |
| 3.322534746  | 13.515015492 | 7.804822922 |
| 2.088337919  | 15.806379240 | 7.804822922 |
| 5.723097839  | 7.187796095  | 7.804822922 |
| 5.036271864  | 8.386462662  | 7.804822922 |
| 2.092603147  | 14.344033076 | 7.804822922 |
| 3.637062172  | 10.885149882 | 7.804822922 |
| 8.501688470  | 0.817285174  | 7.804822922 |
| 7.309746713  | 2.929840259  | 7.804822922 |
| 2.932032838  | 12.111153504 | 7.804822922 |
| 6.094069729  | 5.009079959  | 7.804822922 |
| 7.297372646  | 1.532166546  | 7.804822922 |
| 5.031312728  | 5.943606584  | 7.804822922 |
| 6.058228641  | 3.634948036  | 7.804822922 |
| 3.623062660  | 8.368625117  | 7.804822922 |
| 2.930968108  | 9.619844649  | 7.804822922 |
| 0.990231416  | 13.386225178 | 7.804822922 |
| 1.540402915  | 12.067506977 | 7.804822922 |
| 3.615415936  | 5.843116450  | 7.804822922 |
| 6.057668691  | 0.845392494  | 7.804822922 |
| 2.927855349  | 7.105446456  | 7.804822922 |
| 4.836066398  | 2.952727549  | 7.804822922 |
| 1.527688290  | 9.606052031  | 7.804822922 |
| 0.835498316  | 10.856188048 | 7.804822922 |
| 4.893748983  | 1.570495410  | 7.804822922 |
| 2.853067463  | 4.576826382  | 7.804822922 |
| 3.443333830  | 3.313170846  | 7.804822922 |
| 1.517165492  | 7.096601694  | 7.804822922 |
| 0.827487565  | 8.361087876  | 7.804822922 |
| 3.609928809  | 1.020630391  | 7.804822922 |
| 2.670217920  | 2.063625433  | 7.804822922 |
| 1.422585796  | 4.524455976  | 7.804822922 |
| 0.802897295  | 5.836719959  | 7.804822922 |
| 1.282596281  | 1.838832742  | 7.804822922 |
| 0.639165341  | 3.214889434  | 7.804822922 |
| 0.800618377  | 0.323990940  | 7.804822922 |
| 16.218771266 | 16.461766931 | 7.804822922 |
| 9.924521203  | 9.734095331  | 7.804822922 |
| 9.933976551  | 7.022797814  | 7.804822922 |
| 7.085341408  | 9.763225910  | 7.804822922 |
| 7.095092412  | 7.052075920  | 7.804822922 |
| 8.509770865  | 8.393030858  | 7.804822922 |



1.11.  $\text{FeN}_4$ , Pyridinic-UC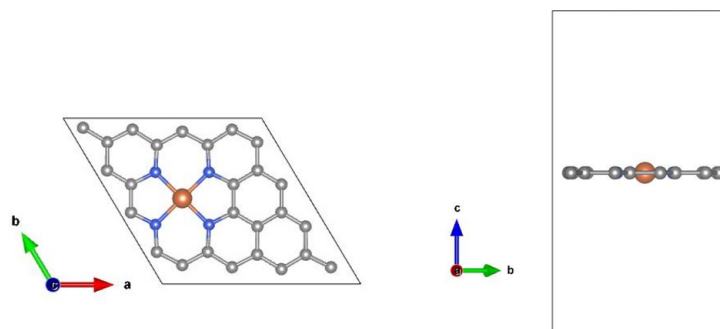

|               |              |               |
|---------------|--------------|---------------|
| 1.0           |              |               |
| 10.0019102097 | 0.0000000000 | 0.0000000000  |
| -5.0009534499 | 8.3605383040 | 0.0000000000  |
| 0.0000000000  | 0.0000000000 | 15.1362419128 |
| C N Fe        |              |               |
| 26 4 1        |              |               |
| Cartesian     |              |               |
| 8.494468149   | 0.851206532  | 7.568120956   |
| 7.213201946   | 2.904323516  | 7.568120956   |
| 6.001147358   | 5.022033012  | 7.568120956   |
| 4.774811753   | 7.151496046  | 7.568120956   |
| 1.000191002   | 0.957436998  | 7.568120956   |
| -1.582506684  | 5.027467765  | 7.568120956   |
| -2.774427744  | 7.151496046  | 7.568120956   |
| 3.507824469   | 0.851206532  | 7.568120956   |
| -0.279153953  | 7.015864416  | 7.568120956   |
| 6.001146588   | 0.755699687  | 7.568120956   |
| 4.789093125   | 2.904323516  | 7.568120956   |
| 3.582891640   | 5.027467765  | 7.568120956   |
| 2.279538653   | 7.015864416  | 7.568120956   |
| -0.279154424  | 1.623358481  | 7.568120956   |
| -1.582506629  | 3.611754883  | 7.568120956   |
| -2.788708151  | 5.734899133  | 7.568120956   |
| -4.000762136  | 7.883522837  | 7.568120956   |
| 2.279537437   | 1.623358481  | 7.568120956   |
| -1.507440165  | 7.788015992  | 7.568120956   |
| 4.774811675   | 1.487726851  | 7.568120956   |
| 3.582890764   | 3.611754883  | 7.568120956   |
| 1.000193376   | 7.681785152  | 7.568120956   |
| 7.227481940   | 1.487726851  | 7.568120956   |
| 6.001146931   | 3.617189886  | 7.568120956   |
| 4.789091897   | 5.734899133  | 7.568120956   |
| 3.507825767   | 7.788015992  | 7.568120956   |
| -0.350683552  | 2.999929777  | 7.568120956   |
| 2.351067407   | 2.999929777  | 7.568120956   |
| -0.350683029  | 5.639292622  | 7.568120956   |
| 2.351067781   | 5.639292622  | 7.568120956   |
| 1.000192114   | 4.319611324  | 7.568120956   |

## 2. Non-planar $MN_4$ binding

In this section, the top view and side view of non-planar binding motifs discussed in Table 2 are shown. Planar pyrrolic  $TiN_4$  and  $VN_4$  are additionally included for comparison with pyridinic motifs.

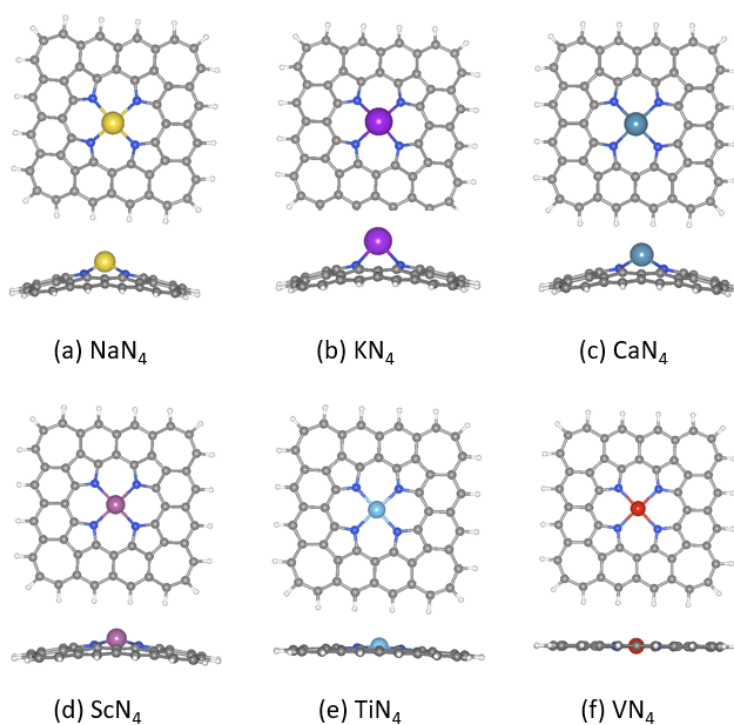

**Figure S1.** (a-d) Top and side views of pyrrolic-1  $MN_4$  clusters with non-planar binding geometries. (e,f) Ti and V are included for comparison with pyridinic structures.

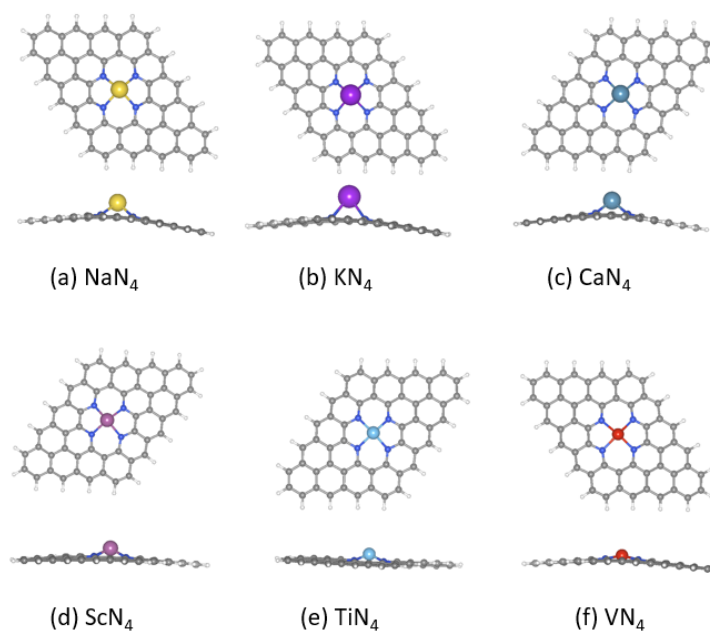

**Figure S2.** Top and side views of pyridinic-1  $MN_4$  clusters with non-planar binding geometries.

### 3. Frontier Molecular Orbitals of Fe and Zn

In this section, the frontier molecular orbitals are plotted to illustrate the differences in binding character between a highly ionic binding character (Zn) and a binding situation involving  $\pi$ -d interaction (Fe). For the pyrrolic-1  $\text{FeN}_4$  cluster,  $\pi$ -d interactions can be observed in all the occupied orbitals shown. In pyridinic-1  $\text{FeN}_4$  cluster, the orbitals illustrating  $\pi$ -d interactions are lower in energy. No significant  $\pi$ -d interaction can be observed for Zn. All orbitals are plotted with Molden.

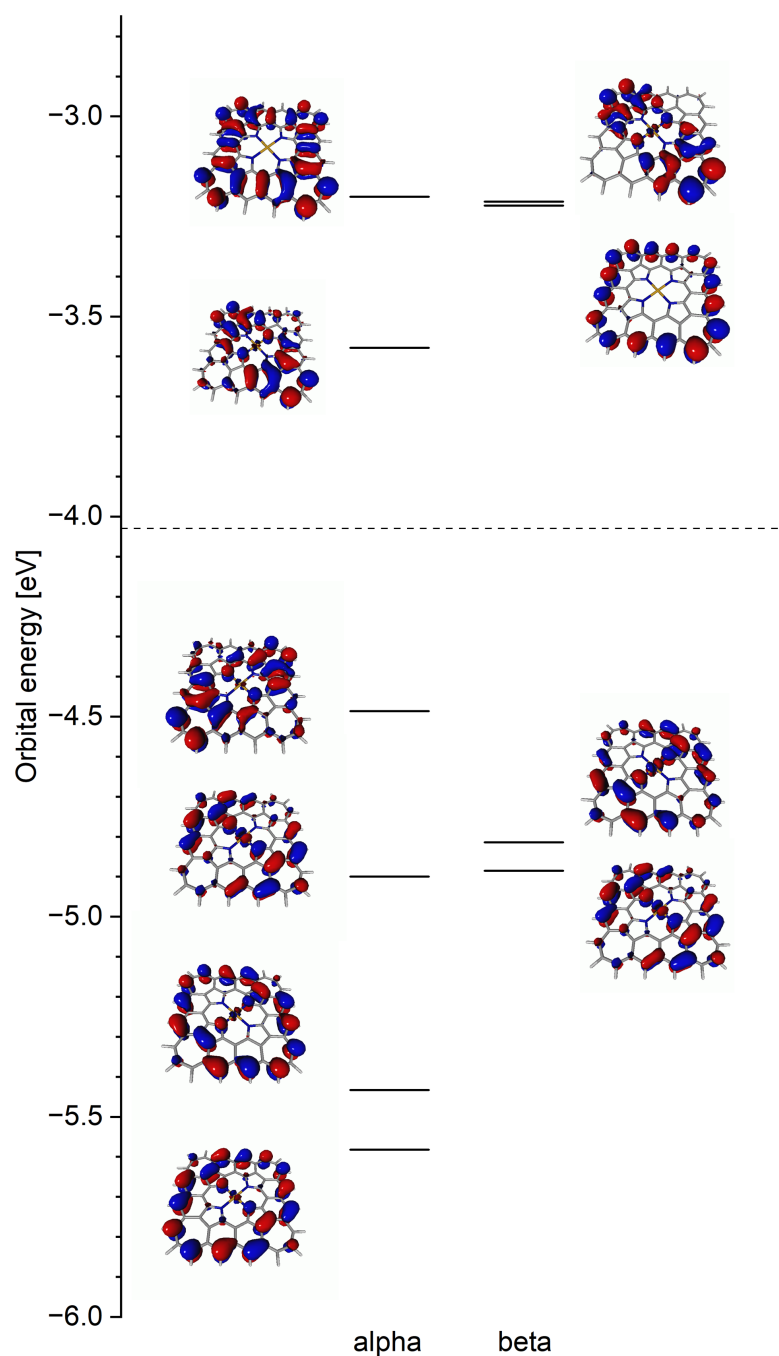

**Figure S3.** Frontier molecular orbitals of  $\text{FeN}_4$  in pyrrolic-1 cluster obtained with PBE0-D3(BJ)/def2-TZVP method. Orbitals below the dashed line are occupied.

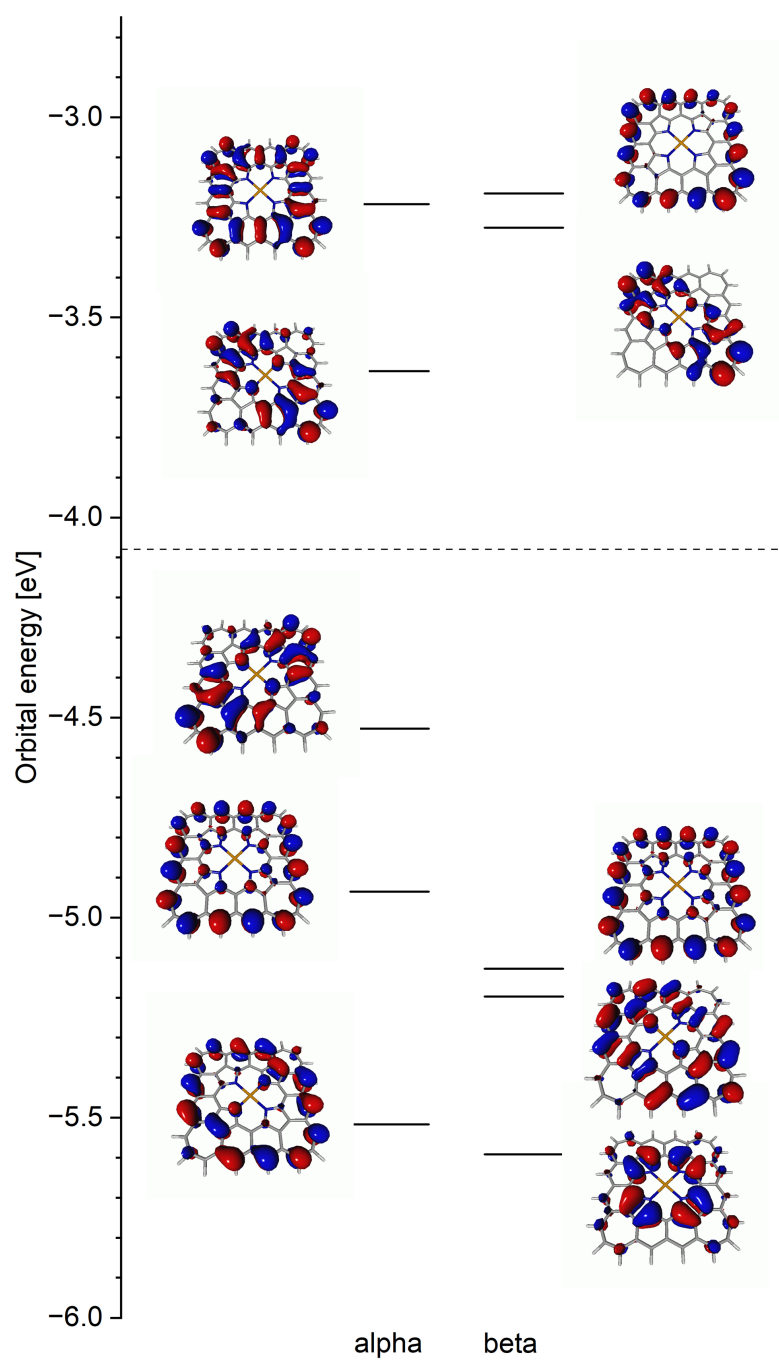

**Figure S4.** Frontier molecular orbitals of ZnN<sub>4</sub> in pyrrolic-1 cluster obtained with PBE0-D3(BJ)/def2-TZVP method. Orbitals below the dashed line are occupied.

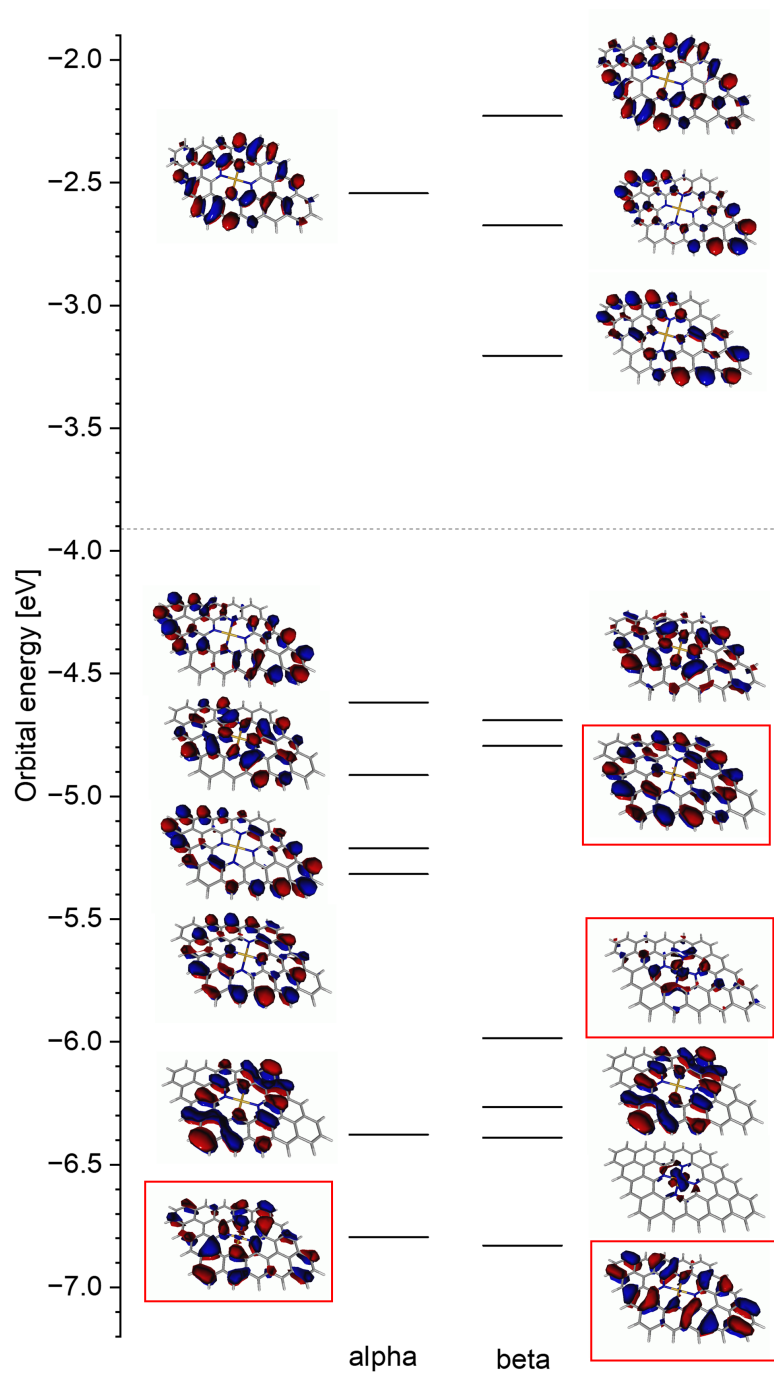

**Figure S5.** Frontier molecular orbitals of FeN<sub>4</sub> in pyridinic-1 cluster obtained with PBE0-D3(BJ)/def2-TZVP method. Orbitals which indicate  $\pi$ -d interactions are highlighted. Orbitals below the dashed line are occupied.

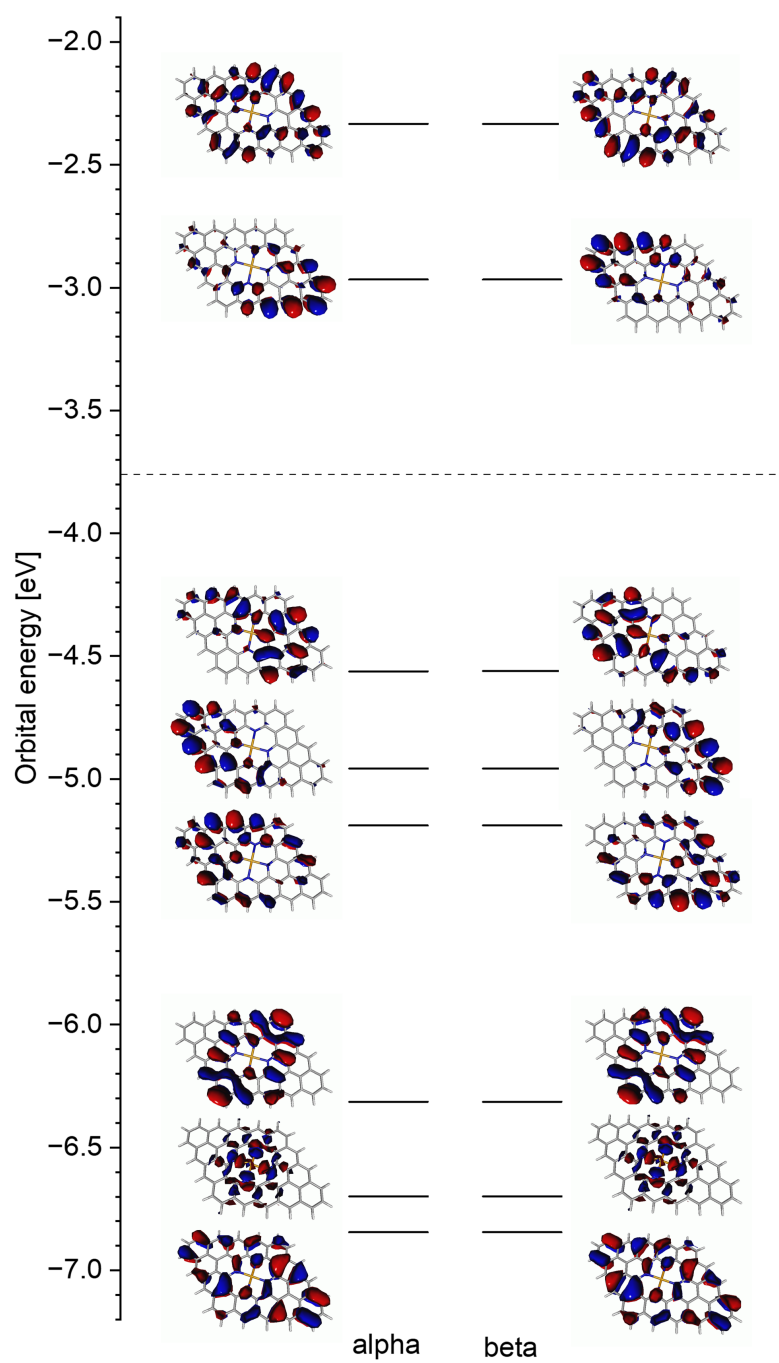

**Figure S6.** Frontier molecular of  $\text{ZnN}_4$  in pyridinic-1 cluster obtained with PBE0-D3(BJ)/def2-TZVP method. Orbitals below the dashed line are occupied.
